# Supplementary material for: The antibacterial effect of silver, zinc-oxide and combination of silver/ zinc oxide nanoparticles coating of orthodontic brackets (an in vitro study)
Source: PubMed Central journal article supplement (PMC9185939; doi:10.1186/s12903-022-02263-6), 2022-06-09

## One-way ANOVA: Control, Ag, Zn0, Ag/Zno

### Method

|                        |                         |
|------------------------|-------------------------|
| Null hypothesis        | All means are equal     |
| Alternative hypothesis | Not all means are equal |
| Significance level     | $\alpha = 0.05$         |

*Equal variances were assumed for the analysis.*

### Factor Information

| Factor | Levels | Values                   |
|--------|--------|--------------------------|
| Factor | 4      | Control, Ag, Zn0, Ag/Zno |

### Analysis of Variance

| Source | DF | Seq SS      | Contribution | Adj SS      | Adj MS      | F-Value | P-Value |
|--------|----|-------------|--------------|-------------|-------------|---------|---------|
| Factor | 3  | 1.92727E+12 | 94.41%       | 1.92727E+12 | 6.42422E+11 | 247.65  | 0.000   |
| Error  | 44 | 1.14141E+11 | 5.59%        | 1.14141E+11 | 2594105114  |         |         |
| Total  | 47 | 2.04141E+12 | 100.00%      |             |             |         |         |

### Model Summary

| S       | R-sq   | R-sq(adj) | PRESS       | R-sq(pred) |
|---------|--------|-----------|-------------|------------|
| 50932.4 | 94.41% | 94.03%    | 1.35837E+11 | 93.35%     |

### Means

| Factor  | N  | Mean   | StDev | 95% CI           |
|---------|----|--------|-------|------------------|
| Control | 12 | 650000 | 73855 | (620368, 679632) |
| Ag      | 12 | 246875 | 33763 | (217243, 276507) |
| Zn0     | 12 | 462500 | 58387 | (432868, 492132) |
| Ag/Zno  | 12 | 128125 | 19310 | (98493, 157757)  |

*Pooled StDev = 50932.4*

### Tukey Pairwise Comparisons

#### Grouping Information Using the Tukey Method and 95% Confidence

| Factor  | N  | Mean   | Grouping |
|---------|----|--------|----------|
| Control | 12 | 650000 | A        |
| Zn0     | 12 | 462500 | B        |
| Ag      | 12 | 246875 | C        |
| Ag/Zno  | 12 | 128125 | D        |

*Means that do not share a letter are significantly different.*

### Tukey Simultaneous Tests for Differences of Means

| Difference of Levels | Difference of Means | SE of Difference | 95% CI | T-Value | Adjusted P-Value |
|----------------------|---------------------|------------------|--------|---------|------------------|
|----------------------|---------------------|------------------|--------|---------|------------------|

|                  |         |       |                    |        |             |
|------------------|---------|-------|--------------------|--------|-------------|
| Ag - Control     | -403125 | 20793 | (-458702, -347548) | -19.39 | 0.000009902 |
| Zn0 - Control    | -187500 | 20793 | (-243077, -131923) | -9.02  | 0.000009902 |
| Ag/Zno - Control | -521875 | 20793 | (-577452, -466298) | -25.10 | 0.000009902 |
| Zn0 - Ag         | 215625  | 20793 | (160048, 271202)   | 10.37  | 0.000009902 |
| Ag/Zno - Ag      | -118750 | 20793 | (-174327, -63173)  | -5.71  | 0.000014989 |
| Ag/Zno - Zn0     | -334375 | 20793 | (-389952, -278798) | -16.08 | 0.000009902 |

Individual confidence level = 98.95%

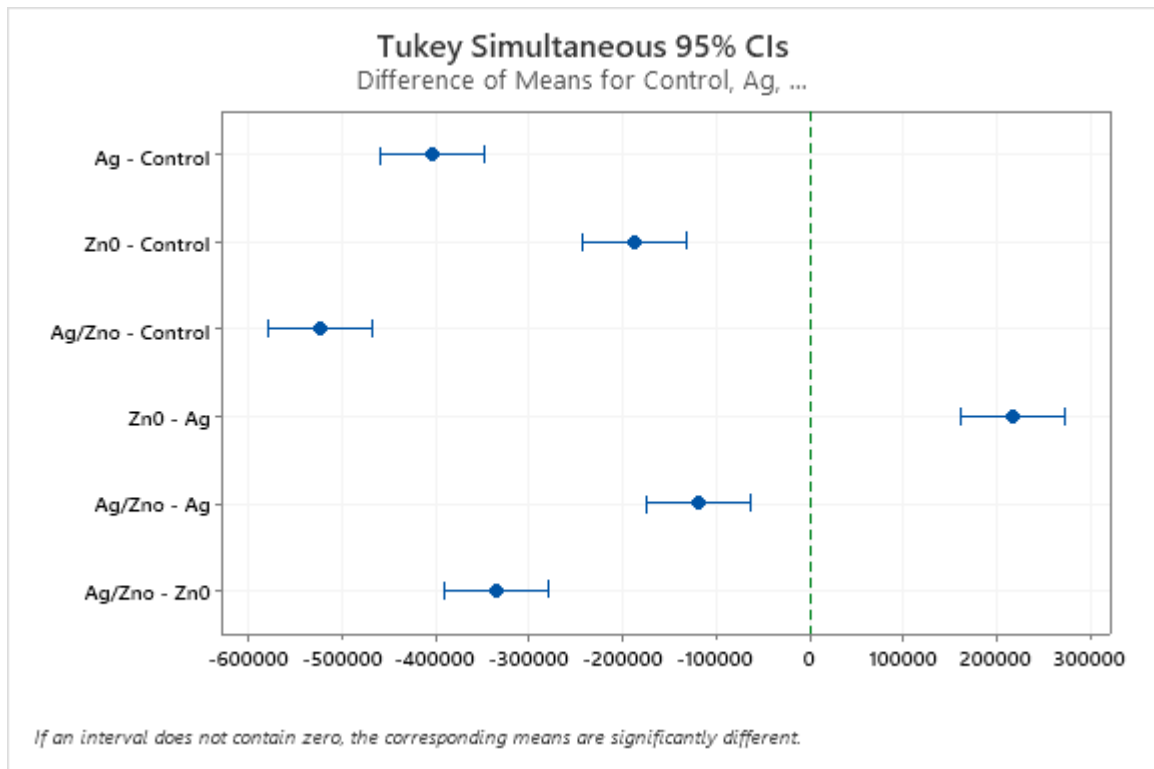

## Fisher Pairwise Comparisons

### Grouping Information Using the Fisher LSD Method and 95% Confidence

| Factor  | N  | Mean   | Grouping |
|---------|----|--------|----------|
| Control | 12 | 650000 | A        |
| Zn0     | 12 | 462500 | B        |
| Ag      | 12 | 246875 | C        |
| Ag/Zno  | 12 | 128125 | D        |

Means that do not share a letter are significantly different.

### Fisher Individual Tests for Differences of Means

| Difference of Levels | Difference of Means | SE of Difference | 95% CI             | T-Value | Adjusted P-Value |
|----------------------|---------------------|------------------|--------------------|---------|------------------|
| Ag - Control         | -403125             | 20793            | (-445031, -361219) | -19.39  | 0.000            |
| Zn0 - Control        | -187500             | 20793            | (-229406, -145594) | -9.02   | 0.000            |

|                  |         |       |                    |        |       |
|------------------|---------|-------|--------------------|--------|-------|
| Ag/Zno - Control | -521875 | 20793 | (-563781, -479969) | -25.10 | 0.000 |
| Zn0 - Ag         | 215625  | 20793 | (173719, 257531)   | 10.37  | 0.000 |
| Ag/Zno - Ag      | -118750 | 20793 | (-160656, -76844)  | -5.71  | 0.000 |
| Ag/Zno - Zn0     | -334375 | 20793 | (-376281, -292469) | -16.08 | 0.000 |

Simultaneous confidence level = 80.20%

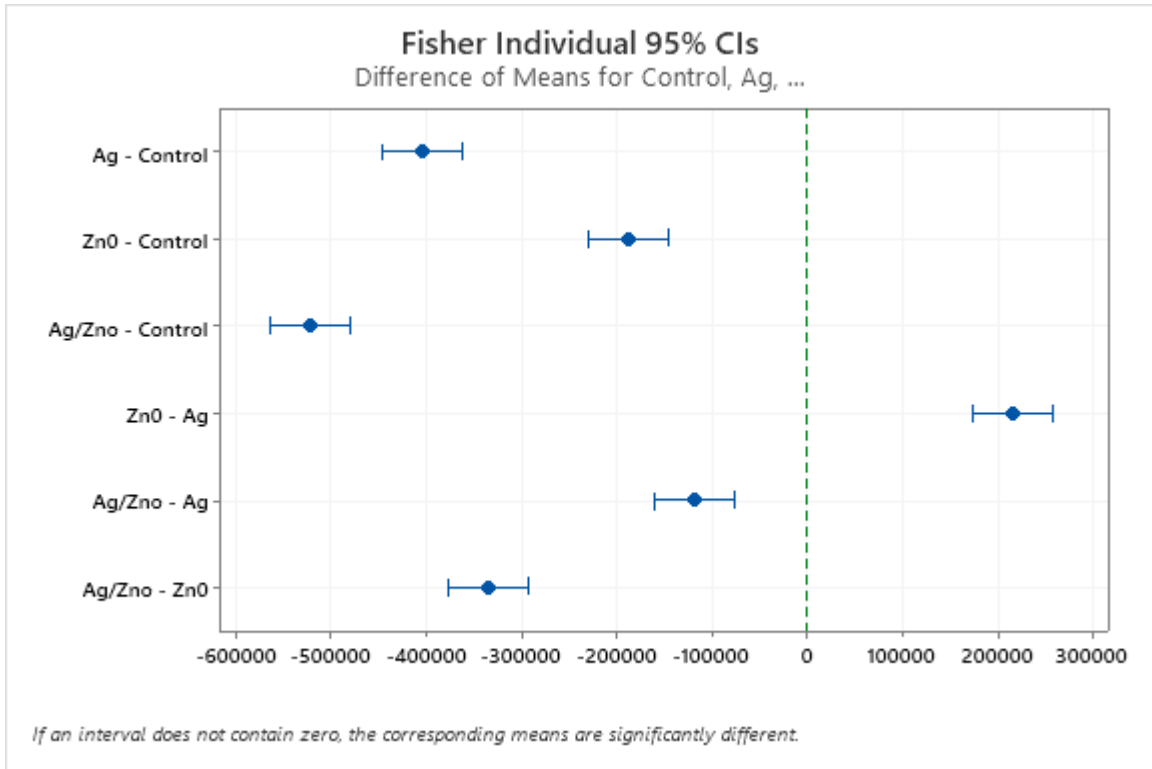

### Dunnett Multiple Comparisons with a Control

#### Grouping Information Using the Dunnett Method and 95% Confidence

| Factor    | N  | Mean   | Grouping |
|-----------|----|--------|----------|
| Control   | 12 | 650000 | A        |
| (control) |    |        |          |
| Zn0       | 12 | 462500 |          |
| Ag        | 12 | 246875 |          |
| Ag/Zno    | 12 | 128125 |          |

Means not labeled with the letter A are significantly different from the control level mean.

#### Dunnett Simultaneous Tests for Level Mean - Control Mean

| Difference of Levels | Difference of Means | SE of Difference | 95% CI             | T-Value | Adjusted P-Value |
|----------------------|---------------------|------------------|--------------------|---------|------------------|
| Ag - Control         | -403125             | 20793            | (-453713, -352537) | -19.39  | 0.000            |
| Zn0 - Control        | -187500             | 20793            | (-238088, -136912) | -9.02   | 0.000            |
| Ag/Zno - Control     | -521875             | 20793            | (-572463, -471287) | -25.10  | 0.000            |

Individual confidence level = 98.09%

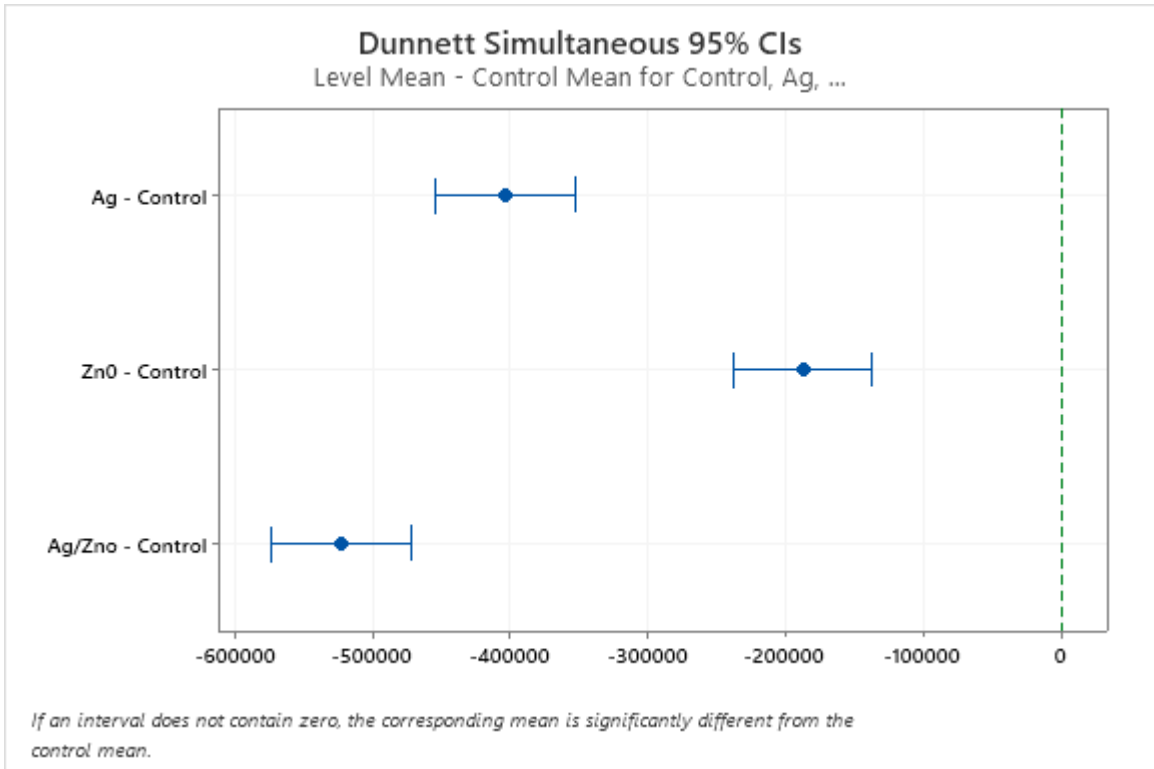

### Hsu Multiple Comparisons with the Best (MCB)

### Hsu Simultaneous Tests for Level Mean - Largest of Other Level Means

| <b>Difference of Levels</b> | <b>Difference of Means</b> | <b>SE of Difference</b> | <b>95% CI</b> | <b>T-Value</b> | <b>Adjusted P-Value</b> |
|-----------------------------|----------------------------|-------------------------|---------------|----------------|-------------------------|
| Control - Zn0               | 187500                     | 20793                   | (0, 231573)   | 9.02           | 0.000                   |
| Ag - Control                | -403125                    | 20793                   | (-447198, 0)  | -19.39         | 0.000                   |
| Zn0 - Control               | -187500                    | 20793                   | (-231573, 0)  | -9.02          | 0.000                   |
| Ag/Zno - Control            | -521875                    | 20793                   | (-565948, 0)  | -25.10         | 0.000                   |

Individual confidence level = 96.03%

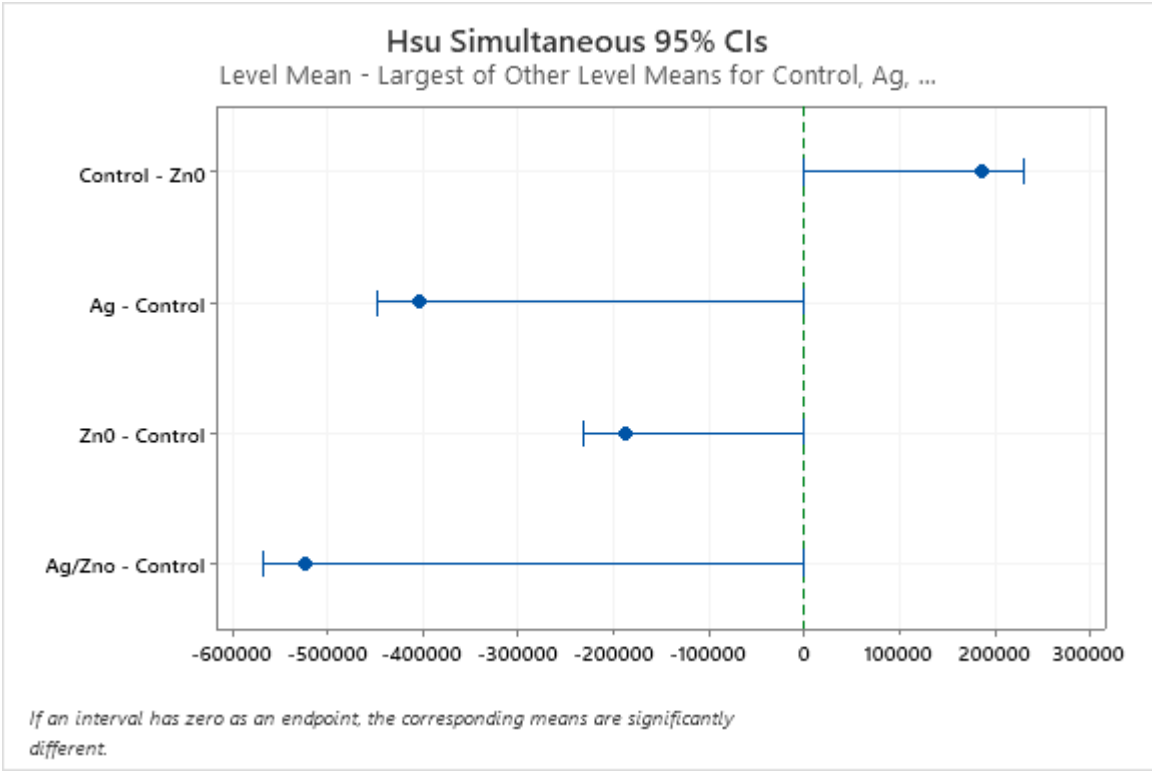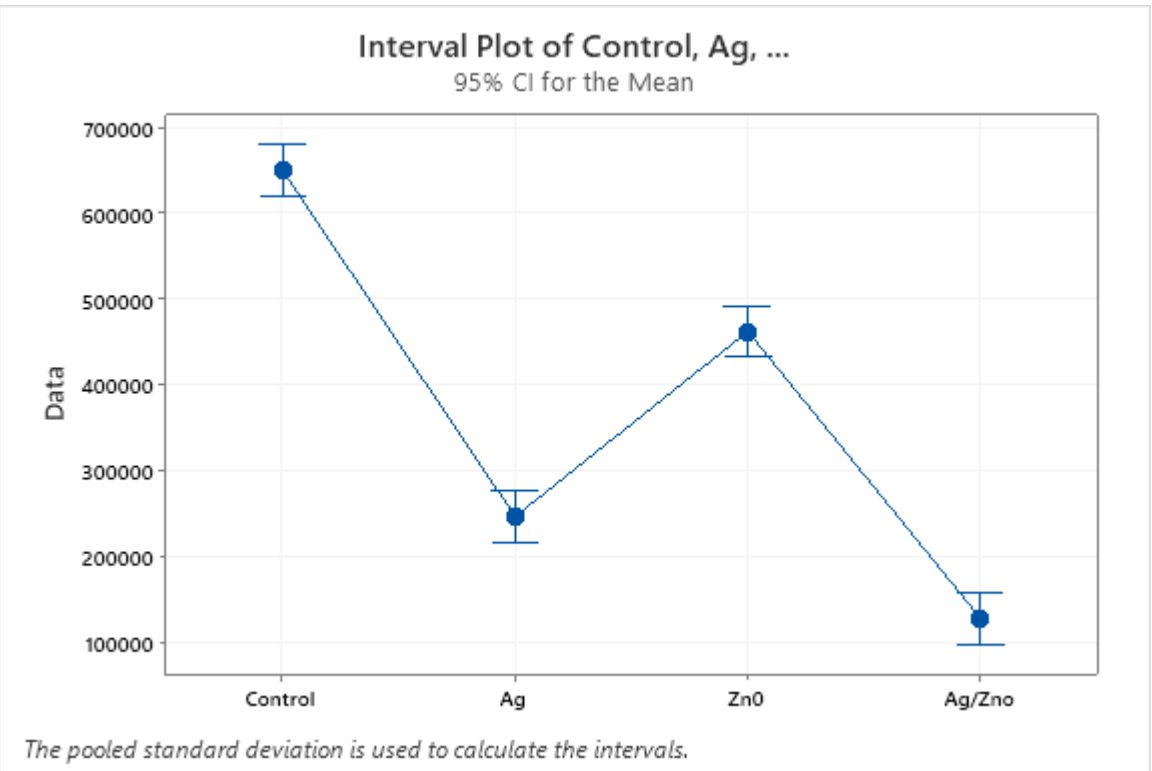

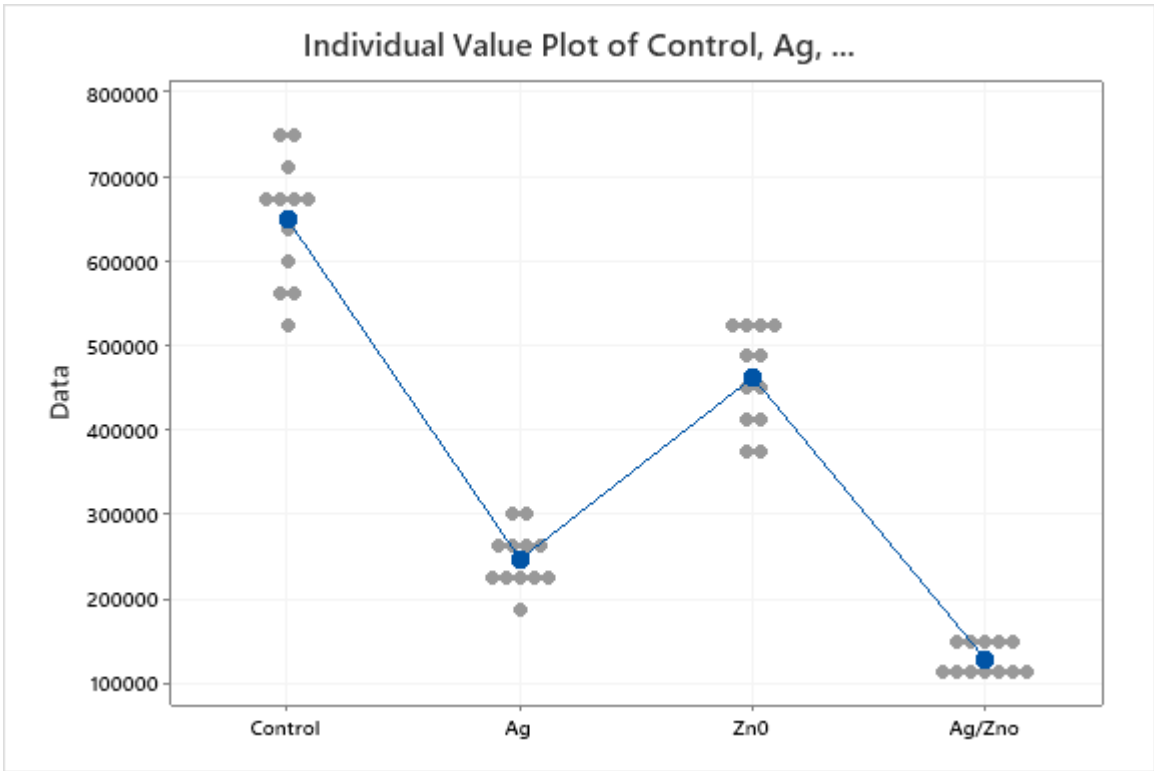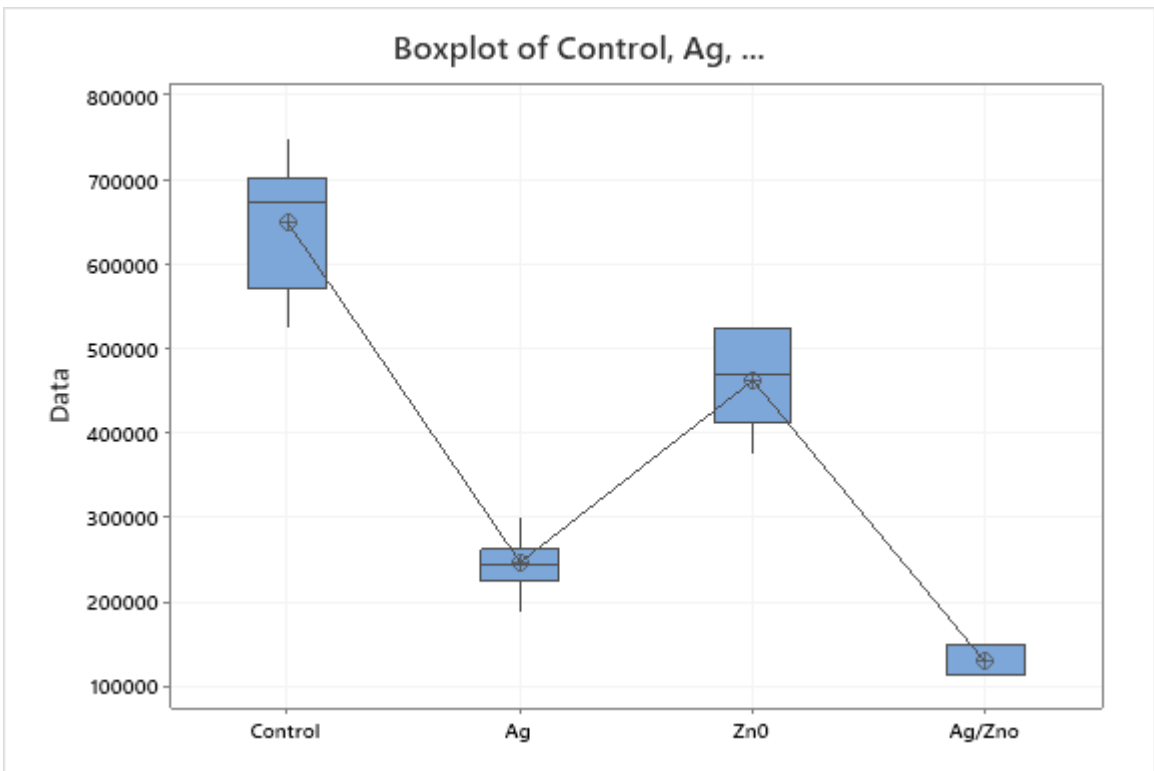

**Histogram**  
(responses are Control, Ag, ...)

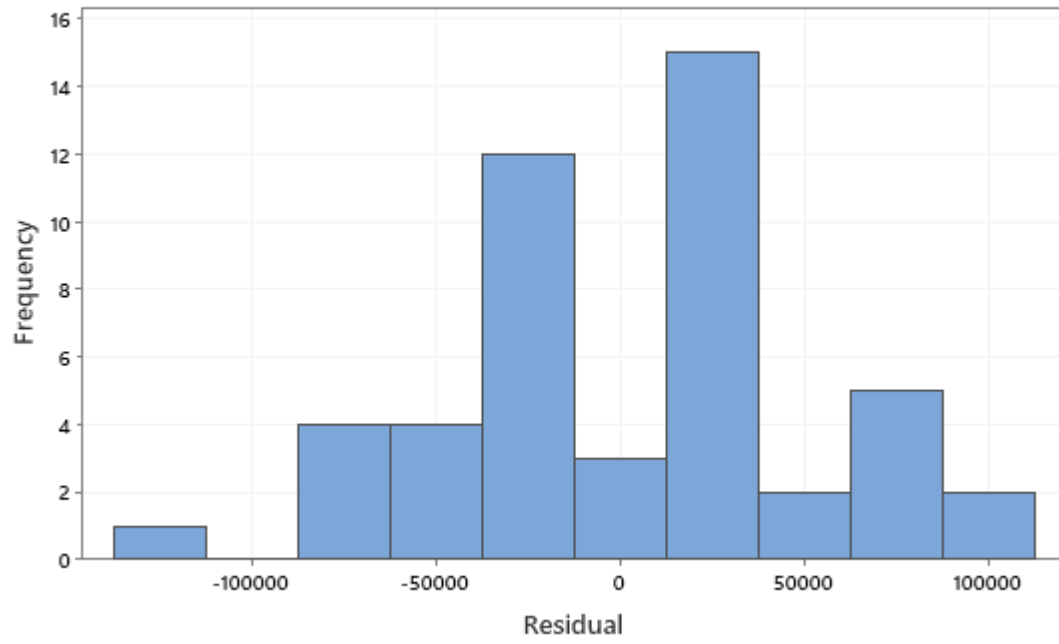

Supplement: 12903_2022_2263_MOESM3_ESM.pdf [file 12903_2022_2263_MOESM3_ESM.pdf]
