# Supplementary material for: The antibacterial effect of silver, zinc-oxide and combination of silver/ zinc oxide nanoparticles coating of orthodontic brackets (an in vitro study)
Source: Springer Nature journal article supplement (doi:10.1186/s12903-022-02263-6), 2022-06-09

# Strepto\_1

WORKSHEET 1

## One-way ANOVA: Ag+Zno, zno, Ag, Control

### Method

Null hypothesis All means are equal  
Alternative hypothesis Not all means are equal  
Significance level  $\alpha = 0.05$

Equal variances were assumed for the analysis.

### Factor Information

| Factor | Levels | Values                   |
|--------|--------|--------------------------|
| Factor | 4      | Ag+Zno, zno, Ag, Control |

### Analysis of Variance

| Source | DF | Adj SS      | Adj MS      | F-Value | P-Value |
|--------|----|-------------|-------------|---------|---------|
| Factor | 3  | 2.54861E+14 | 8.49537E+13 | 249.35  | 0.000   |
| Error  | 44 | 1.49906E+13 | 3.40696E+11 |         |         |
| Total  | 47 | 2.69852E+14 |             |         |         |

### Model Summary

| S      | R-sq   | R-sq(adj) | R-sq(pred) |
|--------|--------|-----------|------------|
| 583692 | 94.44% | 94.07%    | 93.39%     |

### Means

| Factor  | N  | Mean     | StDev  | 95% CI               |
|---------|----|----------|--------|----------------------|
| Ag+Zno  | 12 | 7675000  | 738376 | (7335416, 8014584)   |
| zno     | 12 | 11575000 | 630814 | (11235416, 11914584) |
| Ag      | 12 | 10162500 | 281079 | (9822916, 10502084)  |
| Control | 12 | 14037500 | 583655 | (13697916, 14377084) |

Pooled StDev = 583692

### Tukey Pairwise Comparisons

#### Grouping Information Using the Tukey Method and 95% Confidence

| Factor  | N  | Mean     | Grouping |
|---------|----|----------|----------|
| Control | 12 | 14037500 | A        |
| zno     | 12 | 11575000 | B        |
| Ag      | 12 | 10162500 | C        |
| Ag+Zno  | 12 | 7675000  | D        |

Means that do not share a letter are significantly different.

### Tukey Simultaneous Tests for Differences of Means

| Difference of Levels | Difference of Means | SE of Difference | 95% CI              | T-Value | Adjusted P-Value |
|----------------------|---------------------|------------------|---------------------|---------|------------------|
| zno - Ag+Zno         | 3900000             | 238291           | (3263080, 4536920)  | 16.37   | 0.000010         |
| Ag - Ag+Zno          | 2487500             | 238291           | (1850580, 3124420)  | 10.44   | 0.000010         |
| Control - Ag+Zno     | 6362500             | 238291           | (5725580, 6999420)  | 26.70   | 0.000010         |
| Ag - zno             | -1412500            | 238291           | (-2049420, -775580) | -5.93   | 0.000012         |
| Control - zno        | 2462500             | 238291           | (1825580, 3099420)  | 10.33   | 0.000010         |
| Control - Ag         | 3875000             | 238291           | (3238080, 4511920)  | 16.26   | 0.000010         |

Individual confidence level = 98.95%

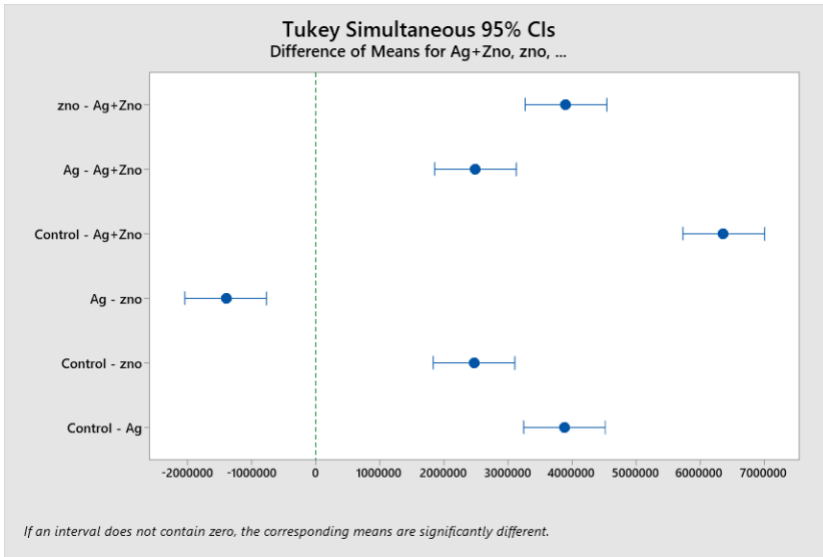

**Dunnnett Multiple Comparisons with a Control**

**Grouping Information Using the Dunnnett Method and 95% Confidence**

| Factor            | N  | Mean     | Grouping |
|-------------------|----|----------|----------|
| Control (control) | 12 | 14037500 | A        |
| zno               | 12 | 11575000 |          |
| Ag                | 12 | 10162500 |          |
| Ag+Zno            | 12 | 7675000  |          |

Means not labeled with the letter A are significantly different from the control level mean.

**Dunnnett Simultaneous Tests for Level Mean - Control Mean**

| Difference of Levels | Difference of Means | SE of Difference | 95% CI               | T-Value | Adjusted P-Value |
|----------------------|---------------------|------------------|----------------------|---------|------------------|
| Ag+Zno - Control     | -6362500            | 238291           | (-6942242, -5782758) | -26.70  | 0.000            |
| zno - Control        | -2462500            | 238291           | (-3042242, -1882758) | -10.33  | 0.000            |
| Ag - Control         | -3875000            | 238291           | (-4454742, -3295258) | -16.26  | 0.000            |

Individual confidence level = 98.09%

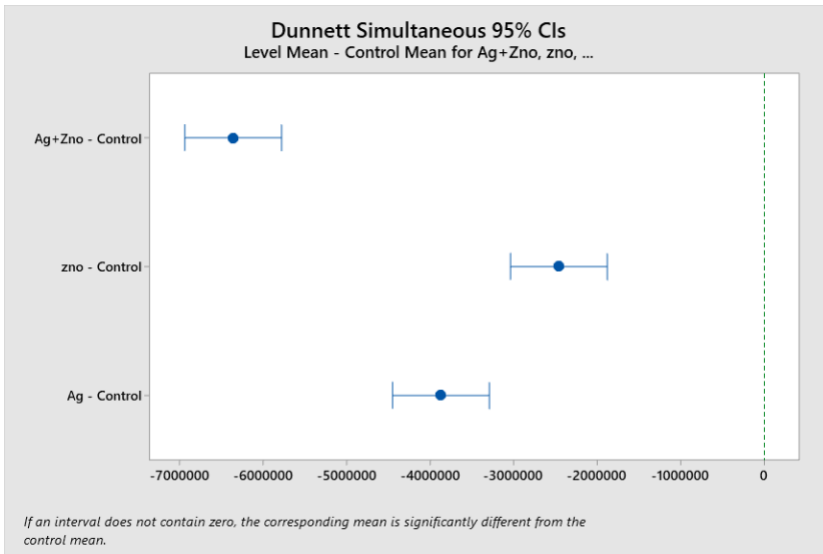

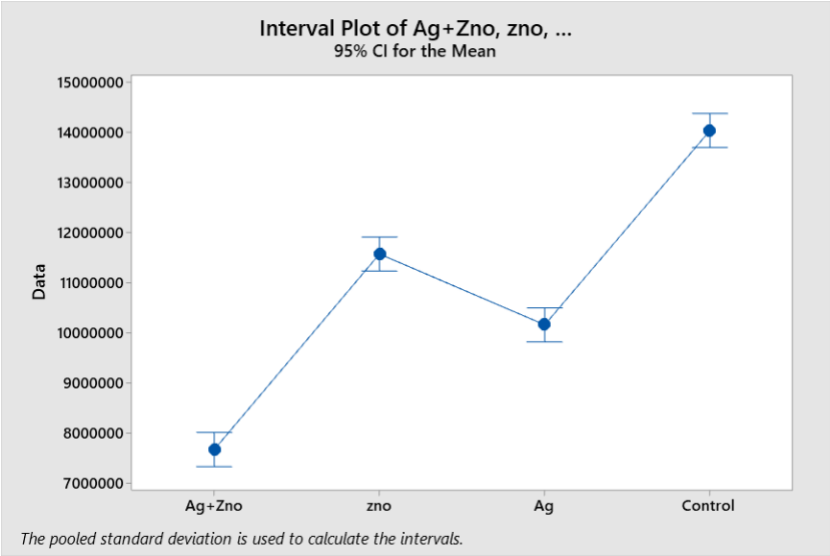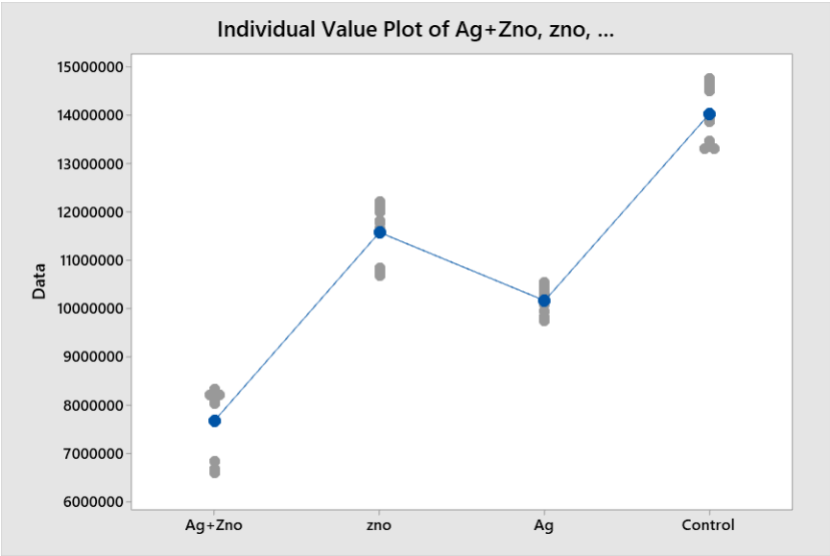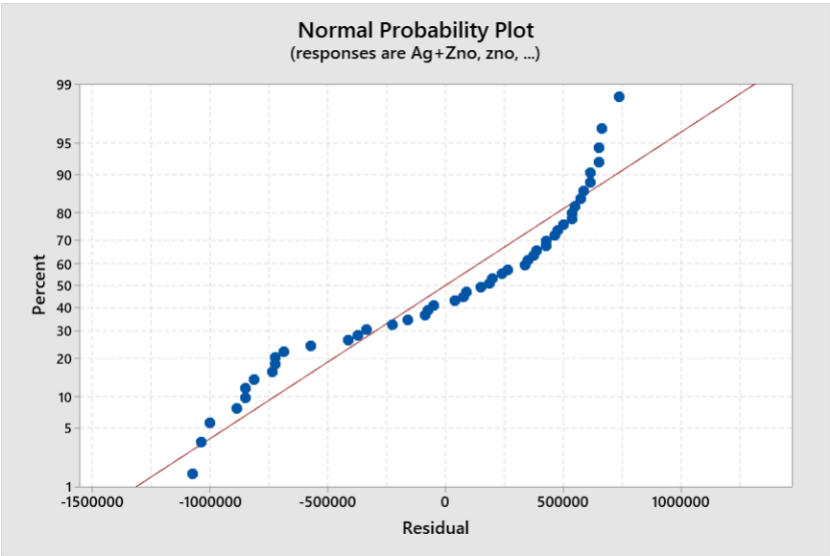

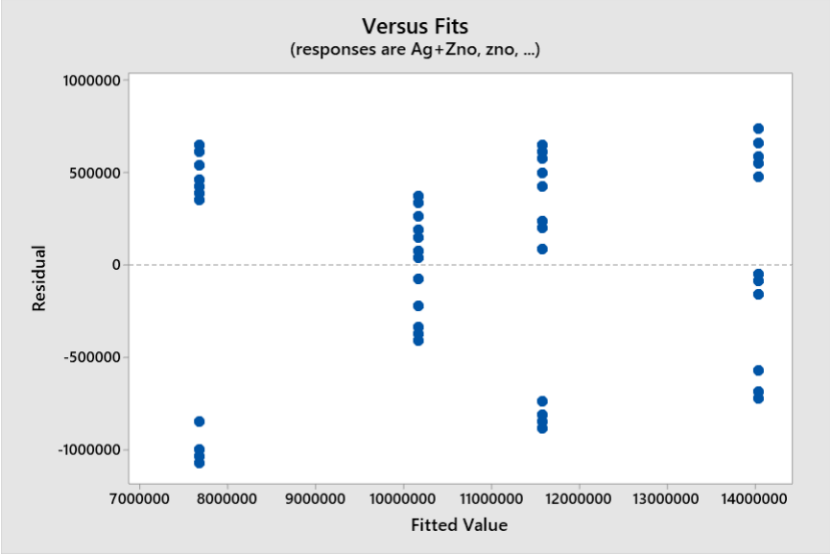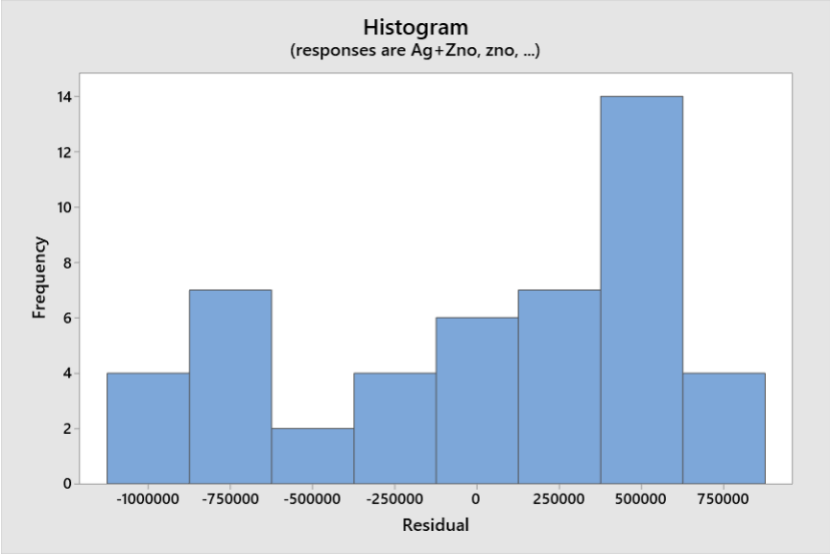

Supplement: MOESM1 [file 23144548]
