# Supplementary material for: The antibacterial effect of silver, zinc-oxide and combination of silver/ zinc oxide nanoparticles coating of orthodontic brackets (an in vitro study)
Source: Springer Nature journal article supplement (doi:10.1186/s12903-022-02263-6), 2022-06-09

## One-way ANOVA: Ag, Ag+ZnO, Zno, Control

### Method

|                        |                         |
|------------------------|-------------------------|
| Null hypothesis        | All means are equal     |
| Alternative hypothesis | Not all means are equal |
| Significance level     | $\alpha = 0.05$         |

*Equal variances were assumed for the analysis.*

### Factor Information

| Factor | Levels | Values                   |
|--------|--------|--------------------------|
| Factor | 4      | Ag, Ag+ZnO, Zno, Control |

### Analysis of Variance

| Source | DF | Adj SS      | Adj MS      | F-Value | P-Value      |
|--------|----|-------------|-------------|---------|--------------|
| Factor | 3  | 2.06437E+14 | 6.88123E+13 | 99.17   | 0.0000000000 |
| Error  | 44 | 3.05318E+13 | 6.93905E+11 |         |              |
| Total  | 47 | 2.36969E+14 |             |         |              |

### Model Summary

| S      | R-sq   | R-sq(adj) | R-sq(pred) |
|--------|--------|-----------|------------|
| 833010 | 87.12% | 86.24%    | 84.67%     |

### Means

| Factor  | N  | Mean     | StDev  | 95% CI               |
|---------|----|----------|--------|----------------------|
| Ag      | 12 | 10066667 | 913866 | (9582033, 10551300)  |
| Ag+ZnO  | 12 | 7520000  | 705717 | (7035366, 8004634)   |
| Zno     | 12 | 11220000 | 997287 | (10735366, 11704634) |
| Control | 12 | 13260000 | 669216 | (12775366, 13744634) |

*Pooled StDev = 833010*

### Tukey Pairwise Comparisons

#### Grouping Information Using the Tukey Method and 95% Confidence

| Factor  | N  | Mean     | Grouping |
|---------|----|----------|----------|
| Control | 12 | 13260000 | A        |
| Zno     | 12 | 11220000 | B        |
| Ag      | 12 | 10066667 | C        |
| Ag+ZnO  | 12 | 7520000  | D        |

*Means that do not share a letter are significantly different.*

### Tukey Simultaneous Tests for Differences of Means

| Difference of Levels | Difference of Means | SE of Difference | 95% CI               | T-Value | Adjusted P-Value |
|----------------------|---------------------|------------------|----------------------|---------|------------------|
| Ag+ZnO - Ag          | -2546667            | 340075           | (-3455640, -1637693) | -7.49   | 0.00000991327    |
| Zno - Ag             | 1153333             | 340075           | (244360, 2062307)    | 3.39    | 0.00778847101    |
| Control - Ag         | 3193333             | 340075           | (2284360, 4102307)   | 9.39    | 0.00000990244    |
| Zno - Ag+ZnO         | 3700000             | 340075           | (2791027, 4608973)   | 10.88   | 0.00000990243    |
| Control - Ag+ZnO     | 5740000             | 340075           | (4831027, 6648973)   | 16.88   | 0.00000990243    |
| Control - Zno        | 2040000             | 340075           | (1131027, 2948973)   | 6.00    | 0.00001182060    |

Individual confidence level = 98.95%

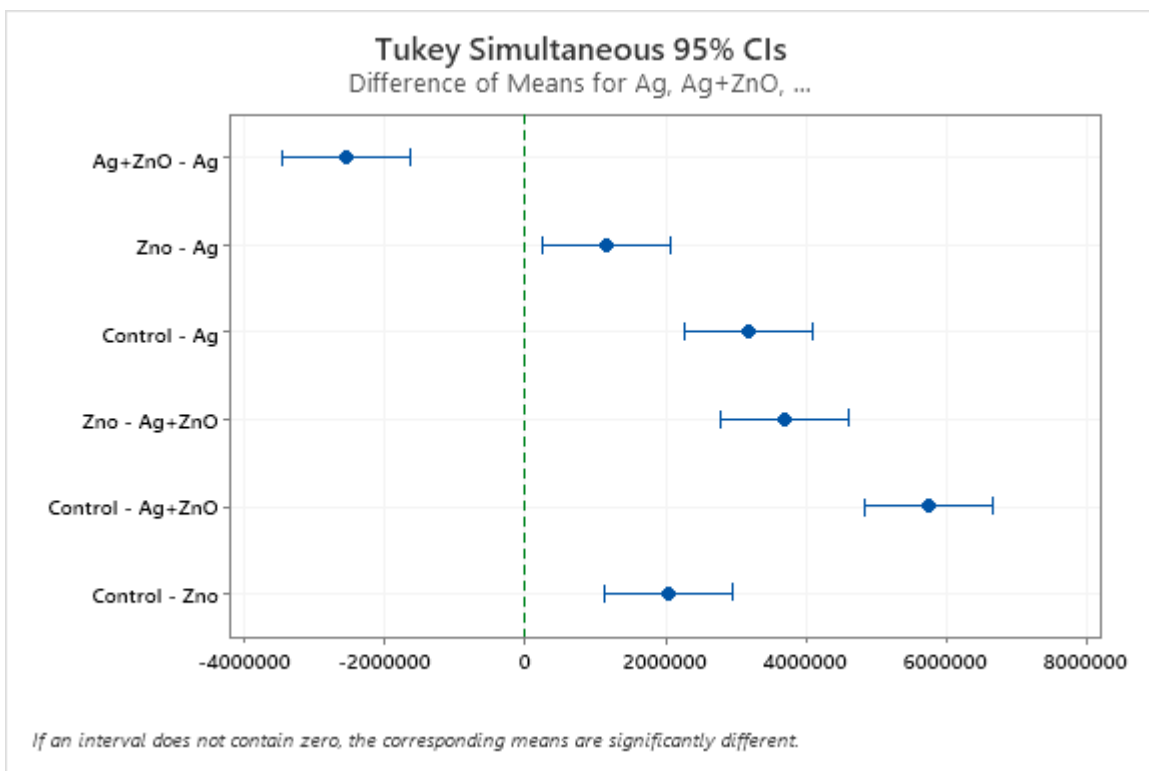

### Fisher Pairwise Comparisons

### Grouping Information Using the Fisher LSD Method and 95% Confidence

| Factor  | N  | Mean     | Grouping |
|---------|----|----------|----------|
| Control | 12 | 13260000 | A        |
| Zno     | 12 | 11220000 | B        |
| Ag      | 12 | 10066667 | C        |
| Ag+ZnO  | 12 | 7520000  | D        |

Means that do not share a letter are significantly different.

### Fisher Individual Tests for Differences of Means

| Difference of Levels | Difference of Means | SE of Difference | 95% CI | T-Value | Adjusted P-Value |
|----------------------|---------------------|------------------|--------|---------|------------------|
|----------------------|---------------------|------------------|--------|---------|------------------|

|                  |          |        |                      |       |       |
|------------------|----------|--------|----------------------|-------|-------|
| Ag+ZnO - Ag      | -2546667 | 340075 | (-3232042, -1861291) | -7.49 | 0.000 |
| Zno - Ag         | 1153333  | 340075 | (467958, 1838709)    | 3.39  | 0.001 |
| Control - Ag     | 3193333  | 340075 | (2507958, 3878709)   | 9.39  | 0.000 |
| Zno - Ag+ZnO     | 3700000  | 340075 | (3014624, 4385376)   | 10.88 | 0.000 |
| Control - Ag+ZnO | 5740000  | 340075 | (5054624, 6425376)   | 16.88 | 0.000 |
| Control - Zno    | 2040000  | 340075 | (1354624, 2725376)   | 6.00  | 0.000 |

Simultaneous confidence level = 80.20%

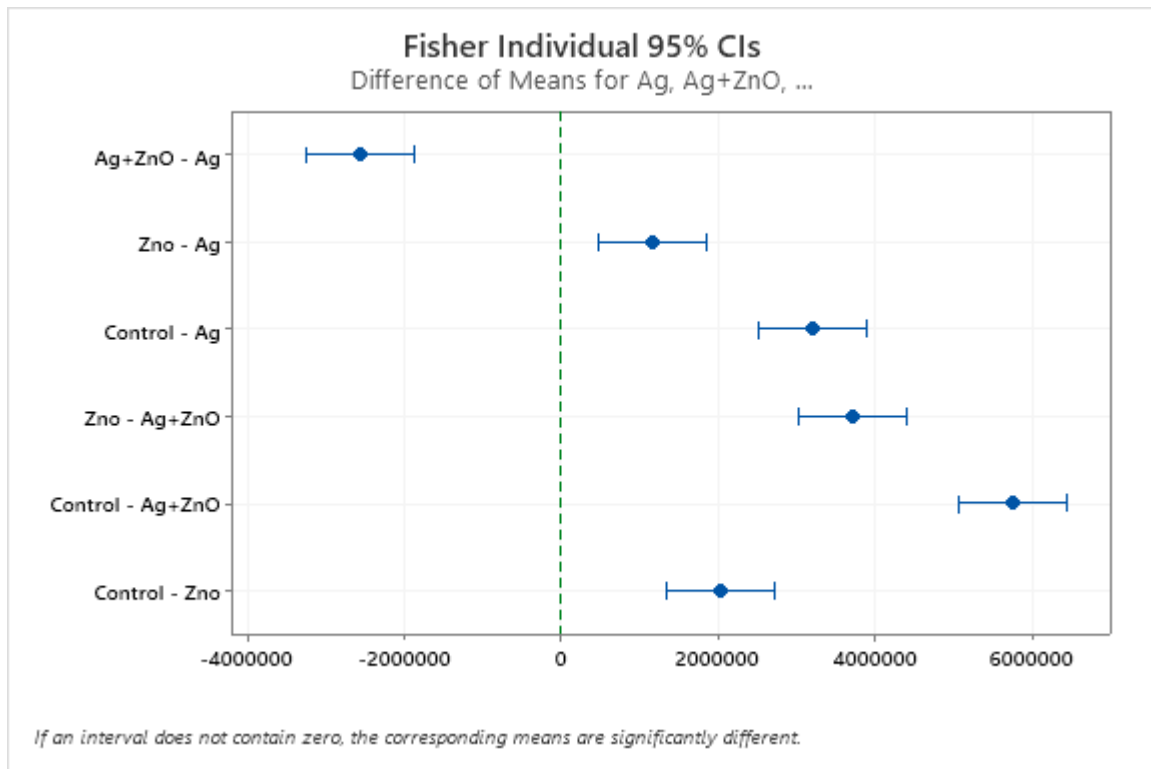

### Dunnnett Multiple Comparisons with a Control

### Grouping Information Using the Dunnnett Method and 95% Confidence

| Factor    | N  | Mean     | Grouping |
|-----------|----|----------|----------|
| Ag        | 12 | 10066667 | A        |
| (control) |    |          |          |
| Control   | 12 | 13260000 |          |
| Zno       | 12 | 11220000 |          |
| Ag+ZnO    | 12 | 7520000  |          |

Means not labeled with the letter A are significantly different from the control level mean.

### Dunnnett Simultaneous Tests for Level Mean - Control Mean

| Difference of Levels | Difference of Means | SE of Difference | 95% CI               | T-Value | Adjusted P-Value |
|----------------------|---------------------|------------------|----------------------|---------|------------------|
| Ag+ZnO - Ag          | -2546667            | 340075           | (-3374039, -1719295) | -7.49   | 0.000            |
| Zno - Ag             | 1153333             | 340075           | (325961, 1980705)    | 3.39    | 0.004            |
| Control - Ag         | 3193333             | 340075           | (2365961, 4020705)   | 9.39    | 0.000            |

Individual confidence level = 98.09%

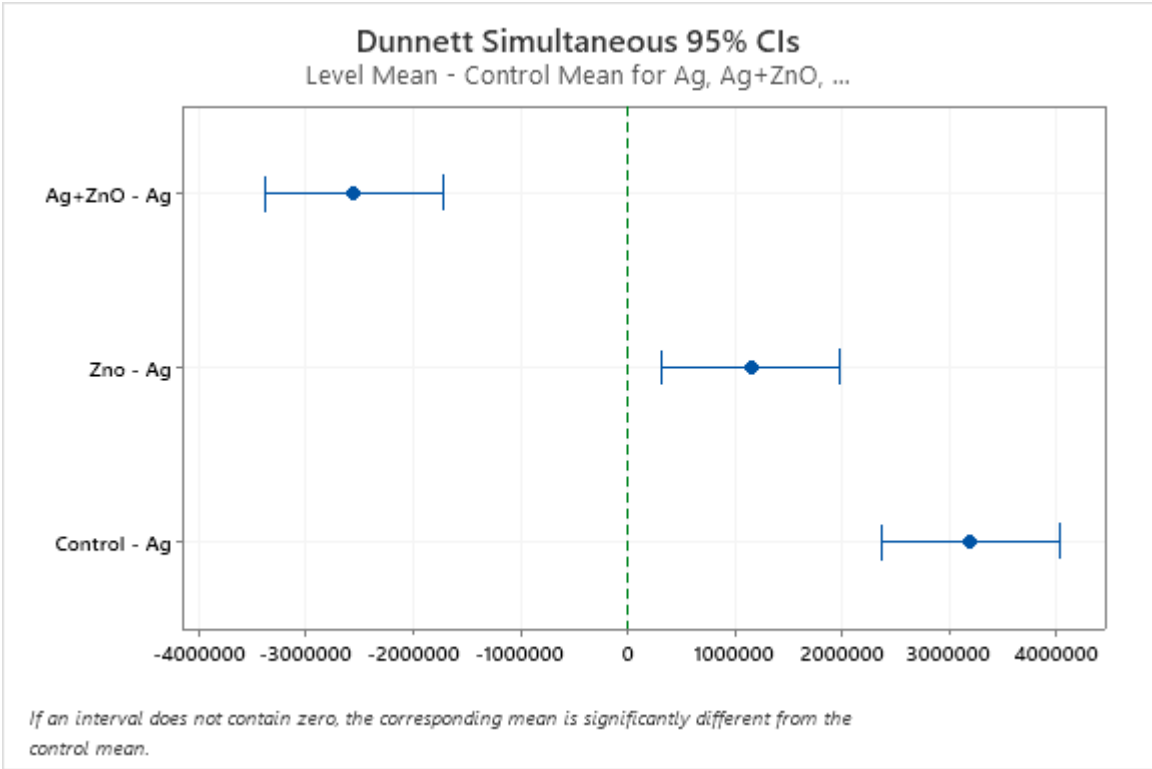

**Hsu Multiple Comparisons with the Best (MCB)**

**Hsu Simultaneous Tests for Level Mean - Largest of Other Level Means**

| <b>Difference of Levels</b> | <b>Difference of Means</b> | <b>SE of Difference</b> | <b>95% CI</b> | <b>T-Value</b> | <b>Adjusted P-Value</b> |
|-----------------------------|----------------------------|-------------------------|---------------|----------------|-------------------------|
| Ag - Control                | -3193333                   | 340075                  | (-3914162, 0) | -9.39          | 0.000                   |
| Ag+ZnO - Control            | -5740000                   | 340075                  | (-6460828, 0) | -16.88         | 0.000                   |
| Zno - Control               | -2040000                   | 340075                  | (-2760828, 0) | -6.00          | 0.000                   |
| Control - Zno               | 2040000                    | 340075                  | (0, 2760828)  | 6.00           | 0.000                   |

*Individual confidence level = 96.03%*

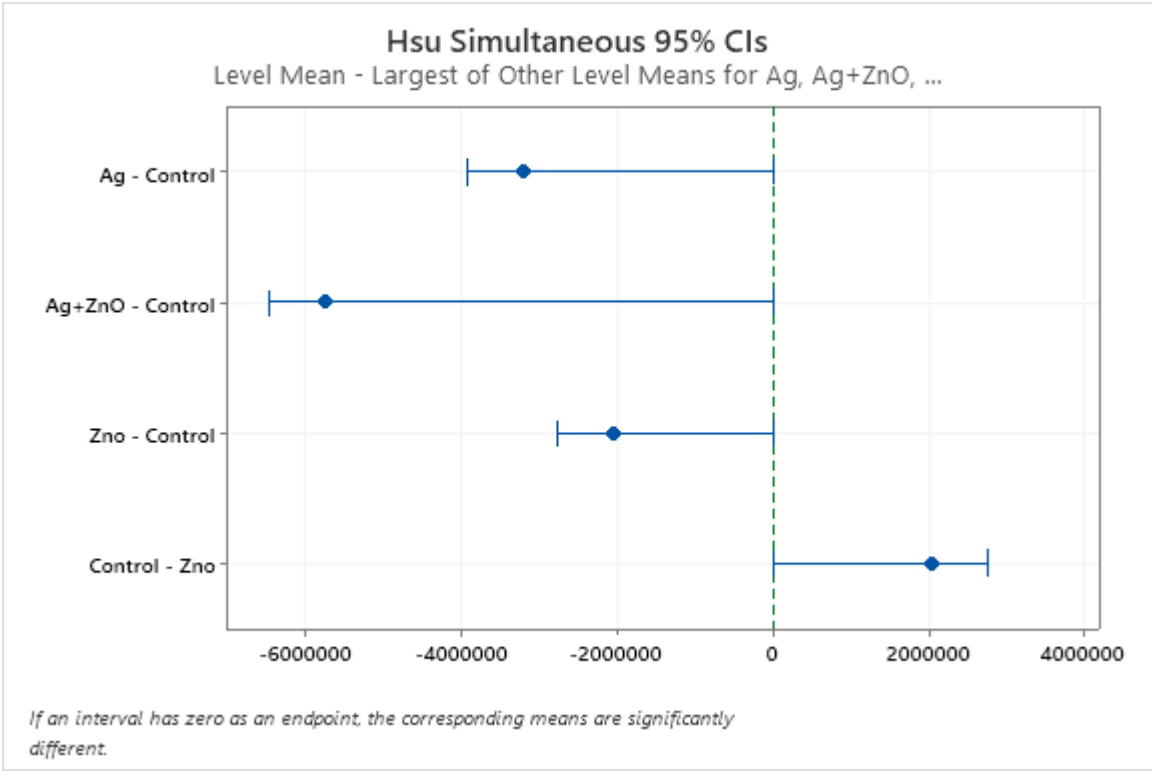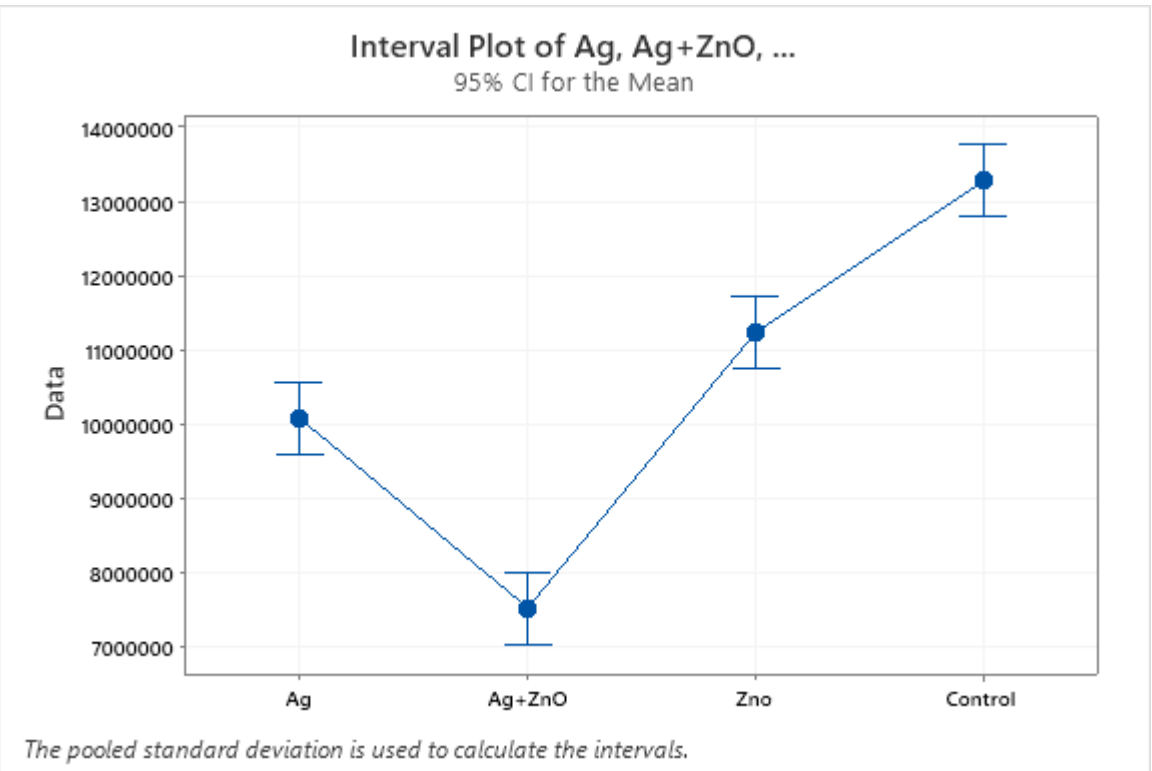

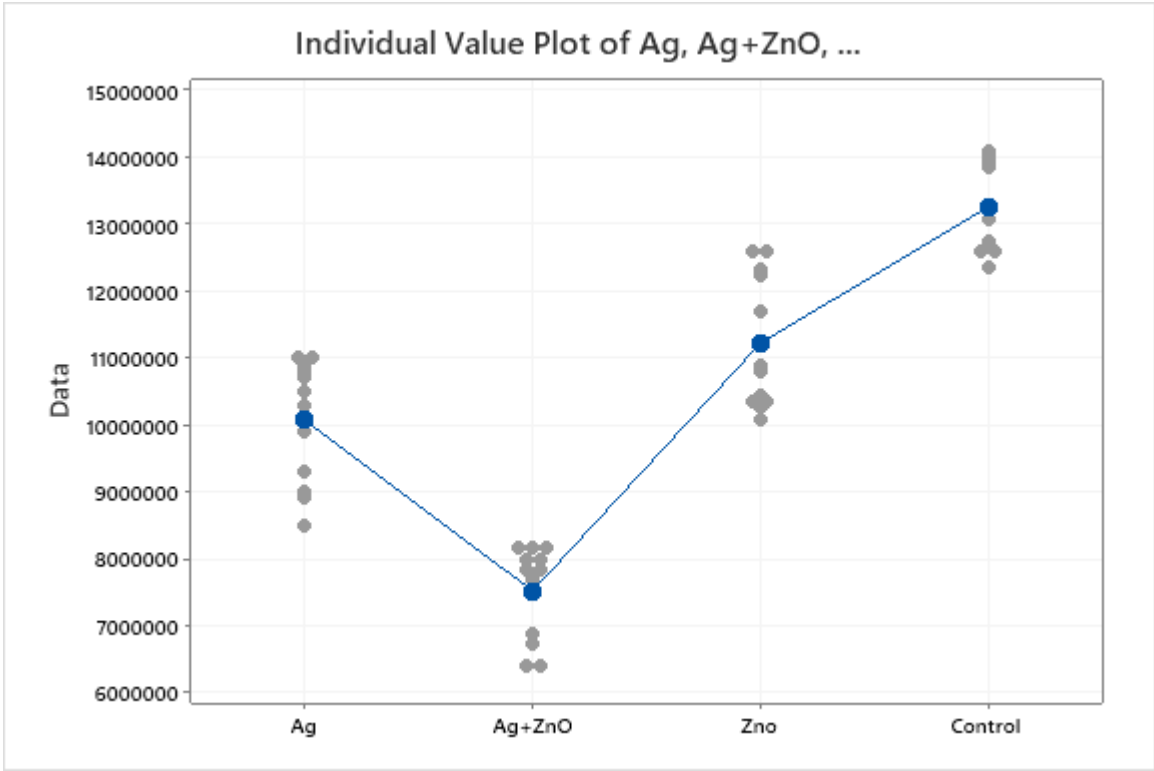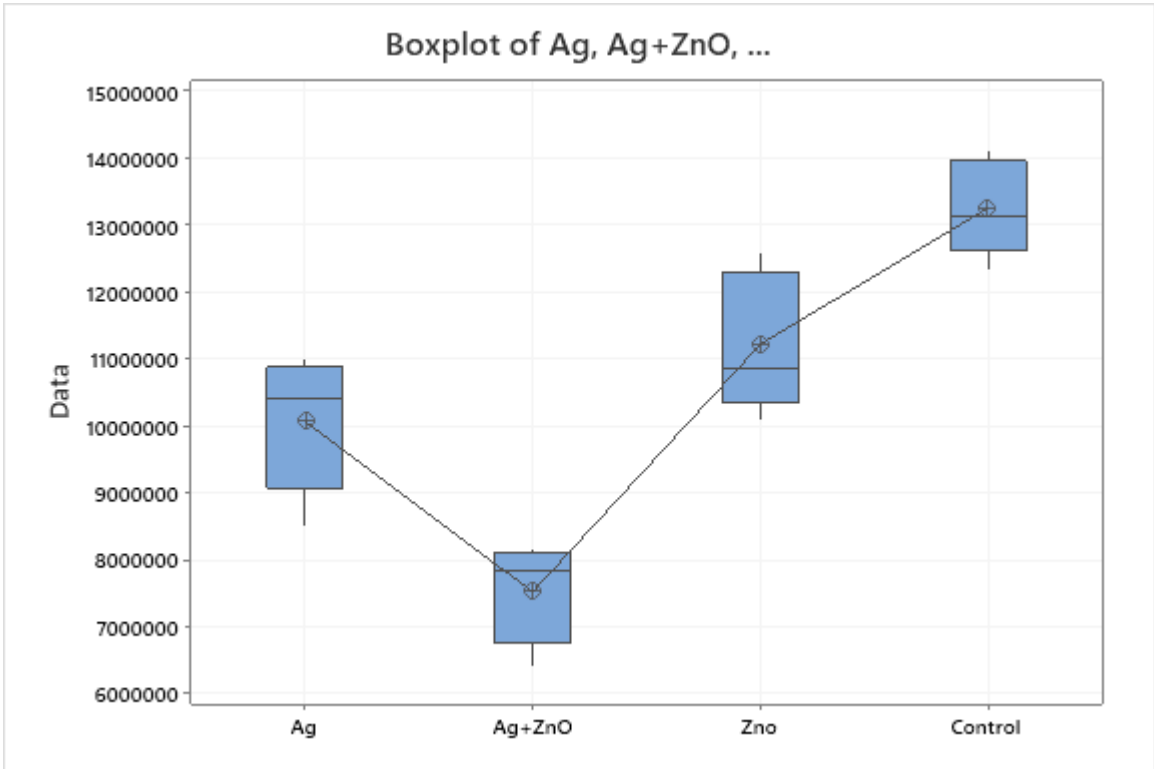

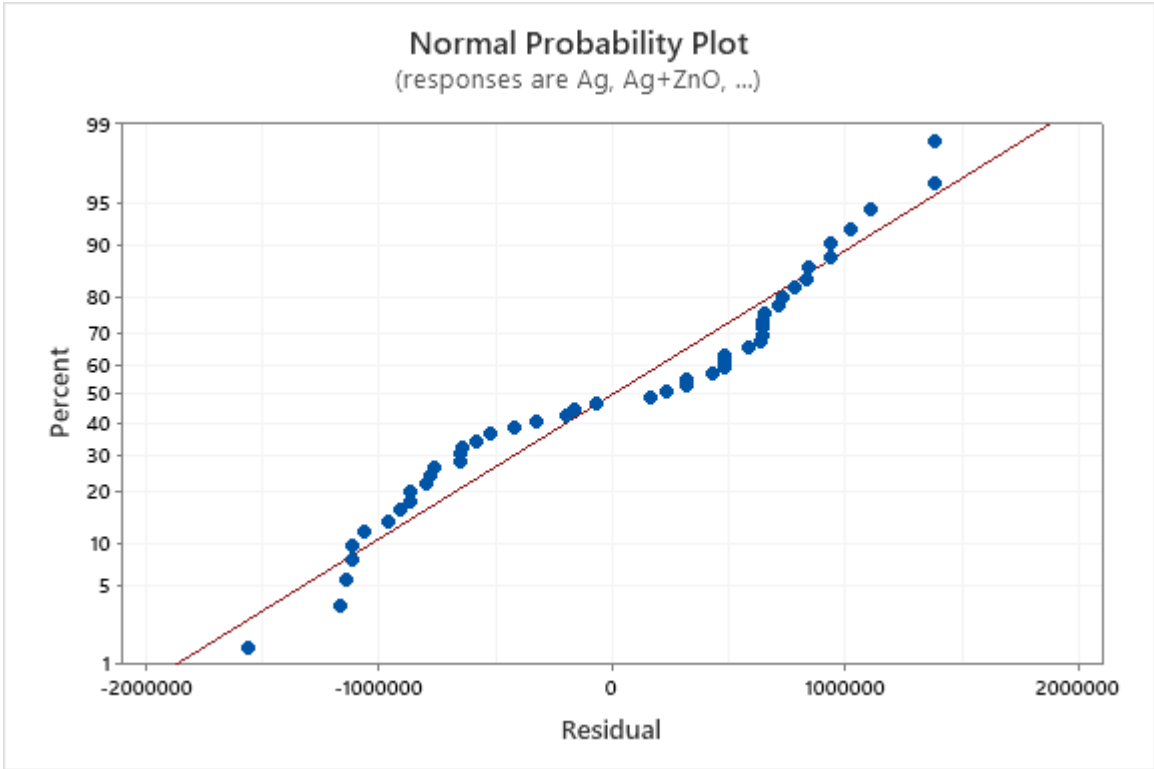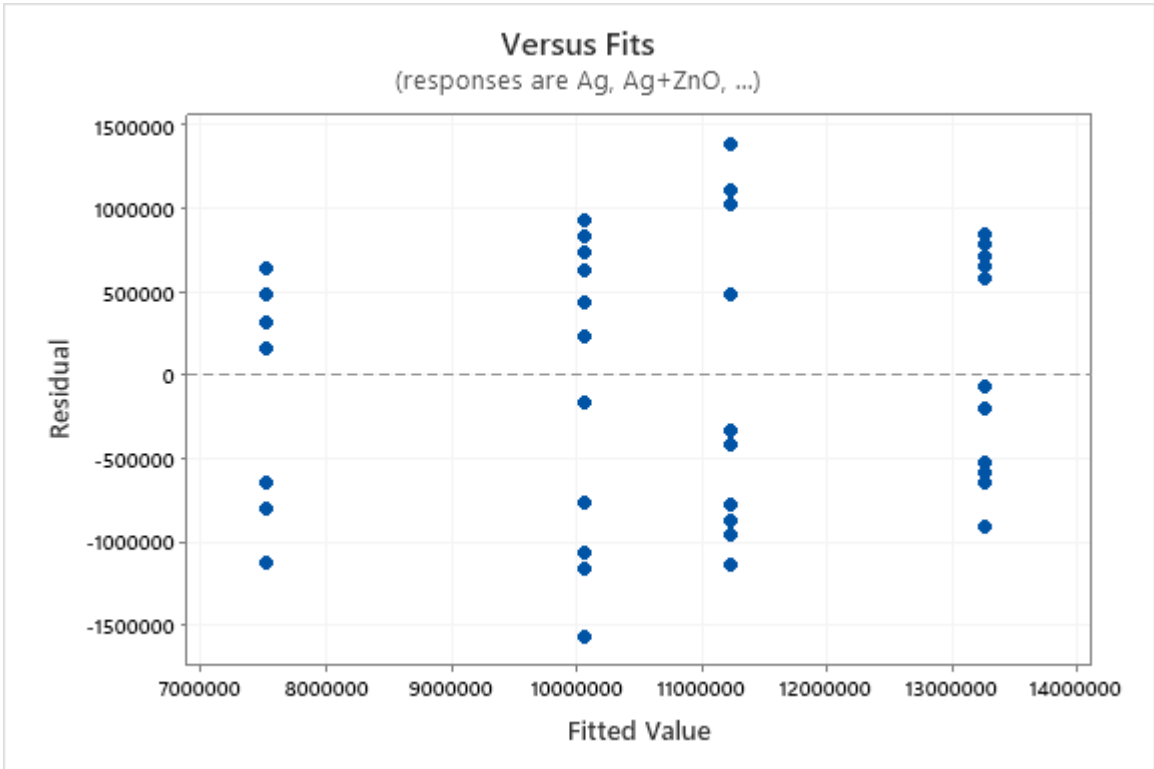

### Histogram

(responses are Ag, Ag+ZnO, ...)

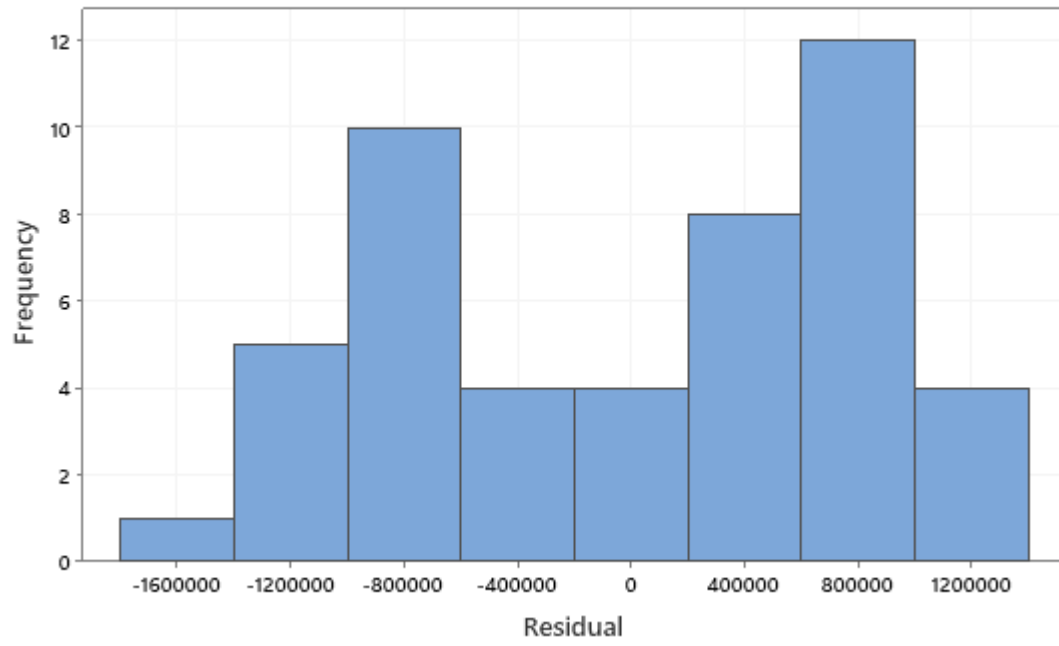

Supplement: MOESM2 [file 23144548]
