# Supplementary material for: The antibacterial effect of silver, zinc-oxide and combination of silver/ zinc oxide nanoparticles coating of orthodontic brackets (an in vitro study)
Source: Springer Nature journal article supplement (doi:10.1186/s12903-022-02263-6), 2022-06-09

## One-way ANOVA: Control, Ag, Zn0, Ag/Zno

### Method

|                        |                         |
|------------------------|-------------------------|
| Null hypothesis        | All means are equal     |
| Alternative hypothesis | Not all means are equal |
| Significance level     | $\alpha = 0.05$         |

*Equal variances were assumed for the analysis.*

### Factor Information

| Factor | Levels | Values                   |
|--------|--------|--------------------------|
| Factor | 4      | Control, Ag, Zn0, Ag/Zno |

### Analysis of Variance

| Source | DF | Seq SS      | Contribution | Adj SS      | Adj MS      | F-Value | P-Value |
|--------|----|-------------|--------------|-------------|-------------|---------|---------|
| Factor | 3  | 2.35723E+12 | 95.17%       | 2.35723E+12 | 7.85742E+11 | 289.24  | 0.000   |
| Error  | 44 | 1.19531E+11 | 4.83%        | 1.19531E+11 | 2716619318  |         |         |
| Total  | 47 | 2.47676E+12 | 100.00%      |             |             |         |         |

### Model Summary

| S       | R-sq   | R-sq(adj) | PRESS       | R-sq(pred) |
|---------|--------|-----------|-------------|------------|
| 52121.2 | 95.17% | 94.84%    | 1.42252E+11 | 94.26%     |

### Means

| Factor  | N  | Mean   | StDev | 95% CI           |
|---------|----|--------|-------|------------------|
| Control | 12 | 712500 | 79950 | (682177, 742823) |
| Ag      | 12 | 262500 | 27696 | (232177, 292823) |
| Zn0     | 12 | 487500 | 57653 | (457177, 517823) |
| Ag/Zno  | 12 | 131250 | 19584 | (100927, 161573) |

*Pooled StDev = 52121.2*

### Tukey Pairwise Comparisons

#### Grouping Information Using the Tukey Method and 95% Confidence

| Factor  | N  | Mean   | Grouping |
|---------|----|--------|----------|
| Control | 12 | 712500 | A        |
| Zn0     | 12 | 487500 | B        |
| Ag      | 12 | 262500 | C        |
| Ag/Zno  | 12 | 131250 | D        |

*Means that do not share a letter are significantly different.*

### Tukey Simultaneous Tests for Differences of Means

| Difference of Levels | Difference of Means | SE of Difference | 95% CI             | T-Value | Adjusted P-Value |
|----------------------|---------------------|------------------|--------------------|---------|------------------|
| Ag - Control         | -450000             | 21278            | (-506874, -393126) | -21.15  | 0.000009902      |
| Zn0 - Control        | -225000             | 21278            | (-281874, -168126) | -10.57  | 0.000009902      |
| Ag/Zno - Control     | -581250             | 21278            | (-638124, -524376) | -27.32  | 0.000009902      |
| Zn0 - Ag             | 225000              | 21278            | (168126, 281874)   | 10.57   | 0.000009902      |
| Ag/Zno - Ag          | -131250             | 21278            | (-188124, -74376)  | -6.17   | 0.000010974      |
| Ag/Zno - Zn0         | -356250             | 21278            | (-413124, -299376) | -16.74  | 0.000009902      |

Individual confidence level = 98.95%

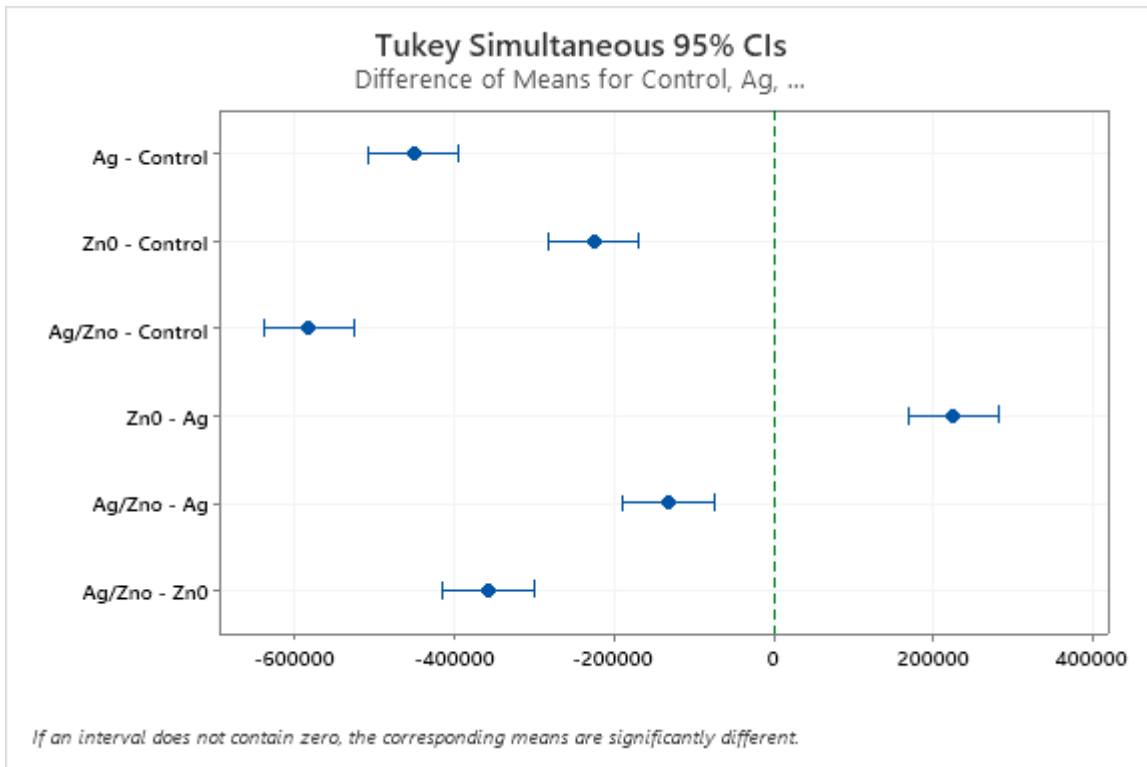

## Fisher Pairwise Comparisons

### Grouping Information Using the Fisher LSD Method and 95% Confidence

| Factor  | N  | Mean   | Grouping |
|---------|----|--------|----------|
| Control | 12 | 712500 | A        |
| Zn0     | 12 | 487500 | B        |
| Ag      | 12 | 262500 | C        |
| Ag/Zno  | 12 | 131250 | D        |

Means that do not share a letter are significantly different.

### Fisher Individual Tests for Differences of Means

| Difference of Levels | Difference of Means | SE of Difference | 95% CI             | T-Value | Adjusted P-Value |
|----------------------|---------------------|------------------|--------------------|---------|------------------|
| Ag - Control         | -450000             | 21278            | (-492884, -407116) | -21.15  | 0.000            |

|                  |         |       |                    |        |       |
|------------------|---------|-------|--------------------|--------|-------|
| Zn0 - Control    | -225000 | 21278 | (-267884, -182116) | -10.57 | 0.000 |
| Ag/Zno - Control | -581250 | 21278 | (-624134, -538366) | -27.32 | 0.000 |
| Zn0 - Ag         | 225000  | 21278 | (182116, 267884)   | 10.57  | 0.000 |
| Ag/Zno - Ag      | -131250 | 21278 | (-174134, -88366)  | -6.17  | 0.000 |
| Ag/Zno - Zn0     | -356250 | 21278 | (-399134, -313366) | -16.74 | 0.000 |

Simultaneous confidence level = 80.20%

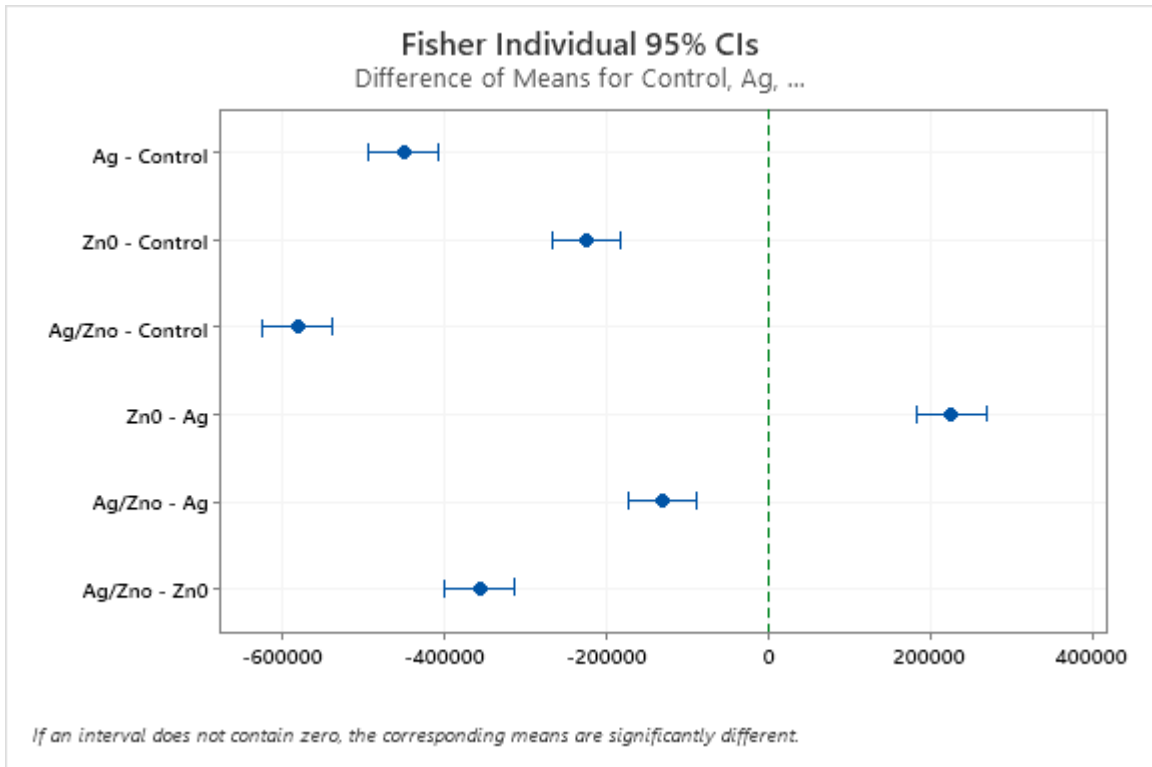

### Dunnett Multiple Comparisons with a Control

### Grouping Information Using the Dunnnett Method and 95% Confidence

| Factor    | N  | Mean   | Grouping |
|-----------|----|--------|----------|
| Control   | 12 | 712500 | A        |
| (control) |    |        |          |
| Zn0       | 12 | 487500 |          |
| Ag        | 12 | 262500 |          |
| Ag/Zno    | 12 | 131250 |          |

Means not labeled with the letter A are significantly different from the control level mean.

### Dunnett Simultaneous Tests for Level Mean - Control Mean

| Difference of Levels | Difference of Means | SE of Difference | 95% CI             | T-Value | Adjusted P-Value |
|----------------------|---------------------|------------------|--------------------|---------|------------------|
| Ag - Control         | -450000             | 21278            | (-501768, -398232) | -21.15  | 0.000            |
| Zn0 - Control        | -225000             | 21278            | (-276768, -173232) | -10.57  | 0.000            |

Ag/Zno - Control      -581250      21278      (-633018, -529482)      -27.32      0.000

Individual confidence level = 98.09%

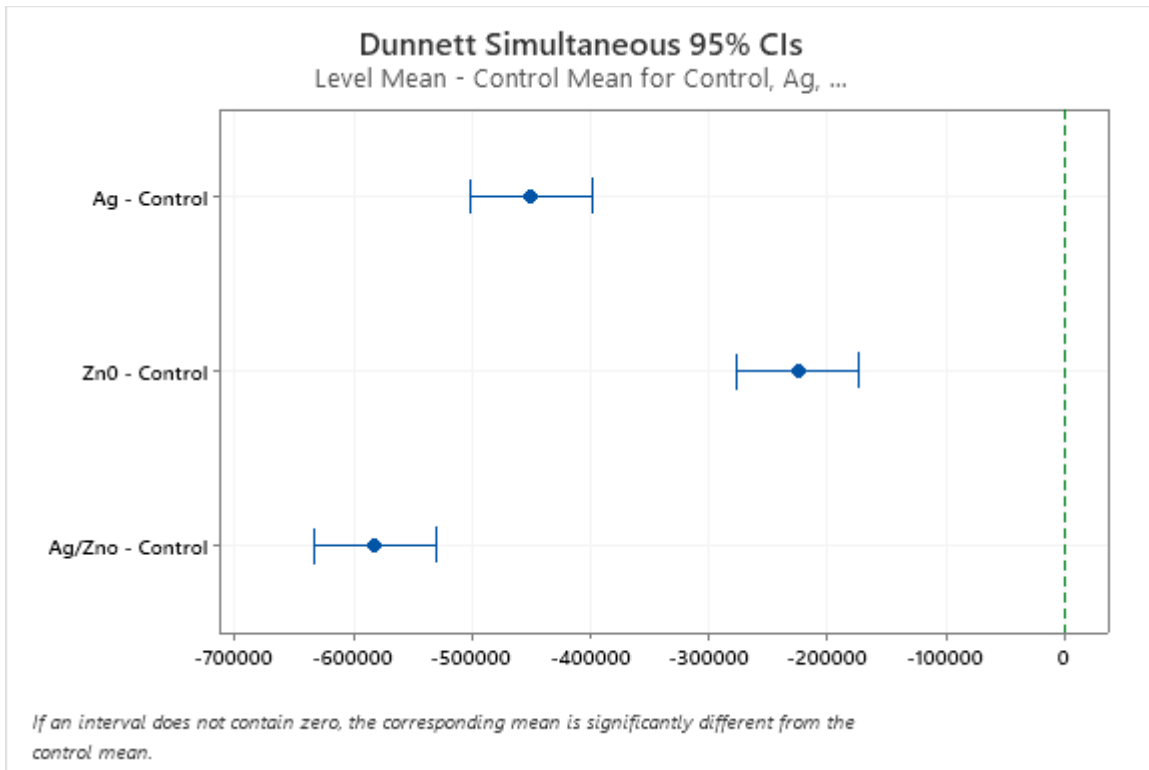

### Hsu Multiple Comparisons with the Best (MCB)

### Hsu Simultaneous Tests for Level Mean - Largest of Other Level Means

| <b>Difference of Levels</b> | <b>Difference of Means</b> | <b>SE of Difference</b> | <b>95% CI</b> | <b>T-Value</b> | <b>Adjusted P-Value</b> |
|-----------------------------|----------------------------|-------------------------|---------------|----------------|-------------------------|
| Control - Zn0               | 225000                     | 21278                   | (0, 270102)   | 10.57          | 0.000                   |
| Ag - Control                | -450000                    | 21278                   | (-495102, 0)  | -21.15         | 0.000                   |
| Zn0 - Control               | -225000                    | 21278                   | (-270102, 0)  | -10.57         | 0.000                   |
| Ag/Zno - Control            | -581250                    | 21278                   | (-626352, 0)  | -27.32         | 0.000                   |

Individual confidence level = 96.03%

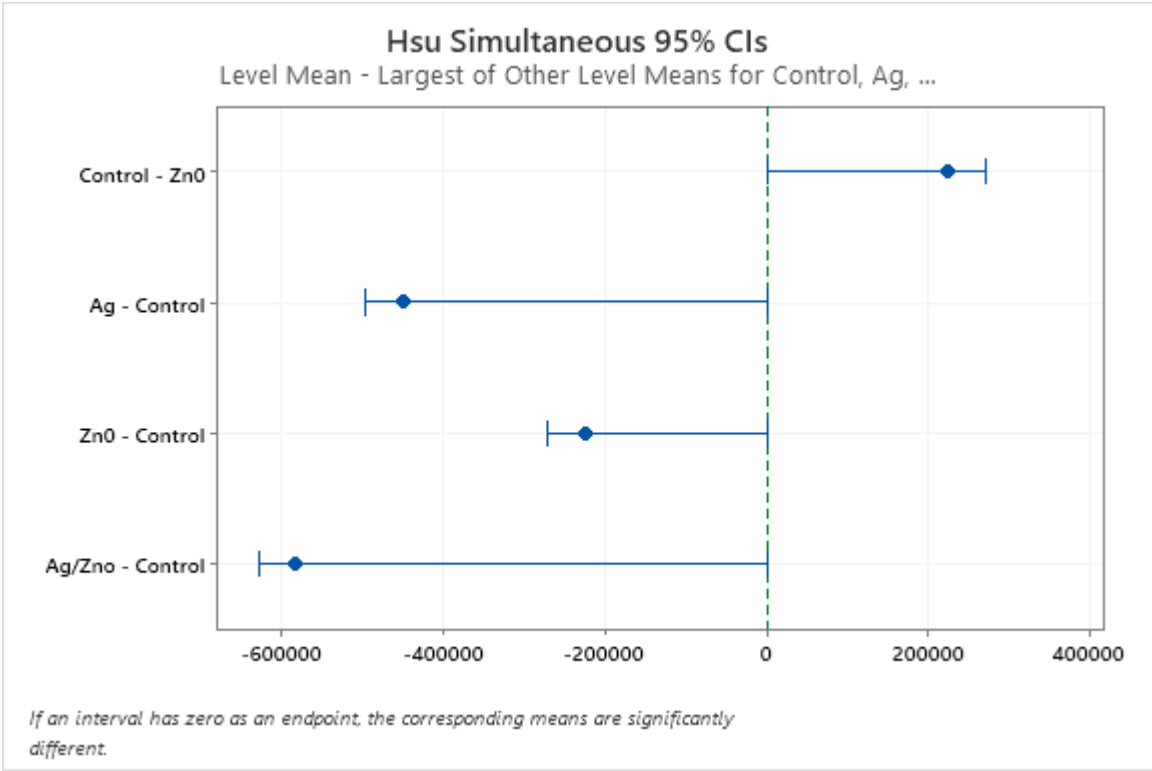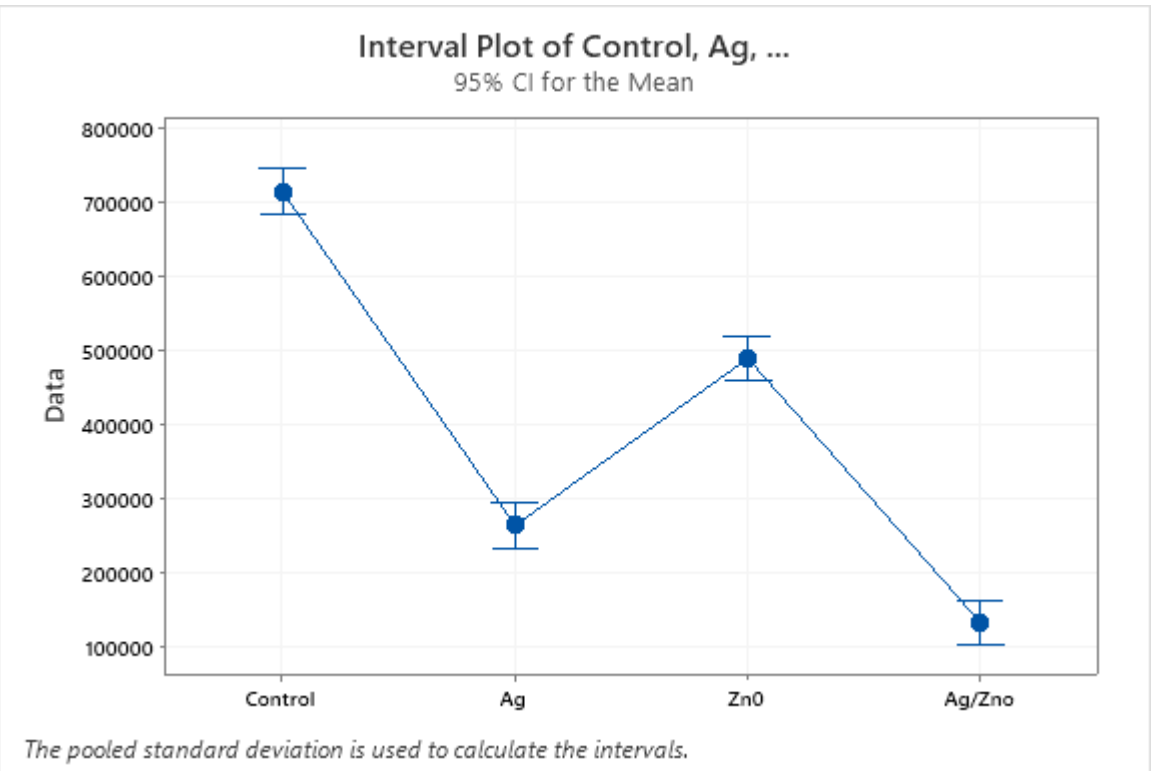

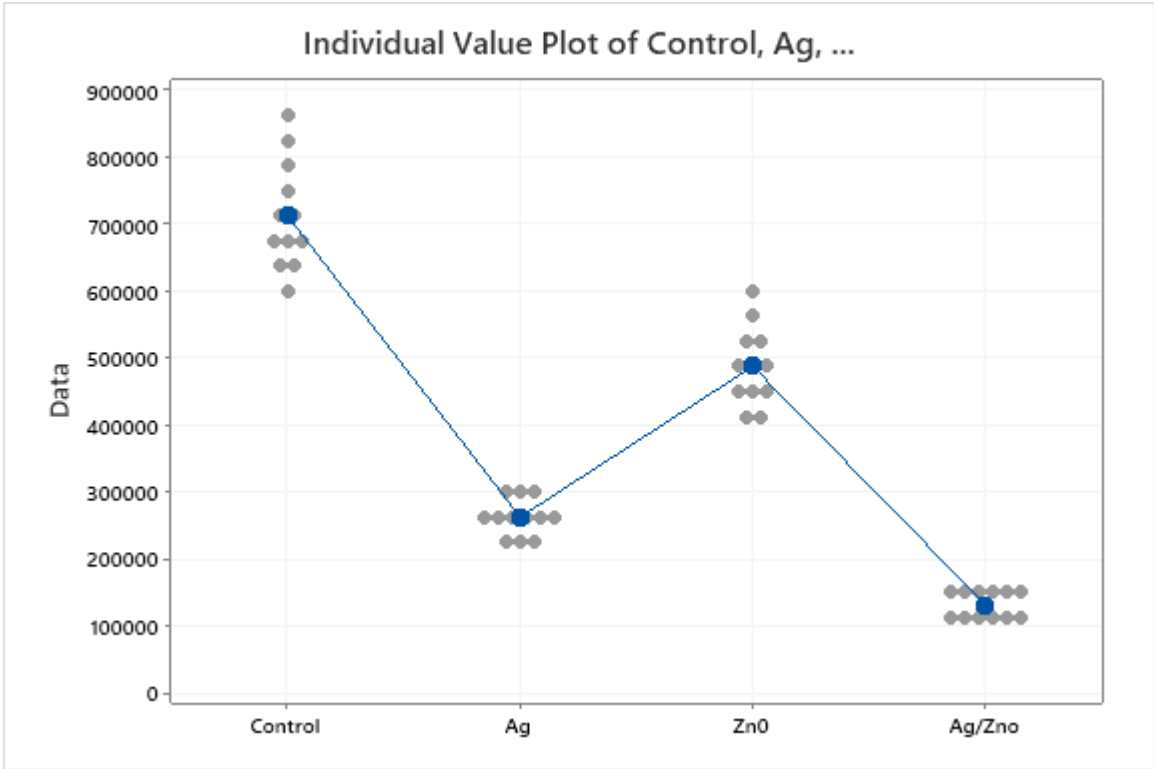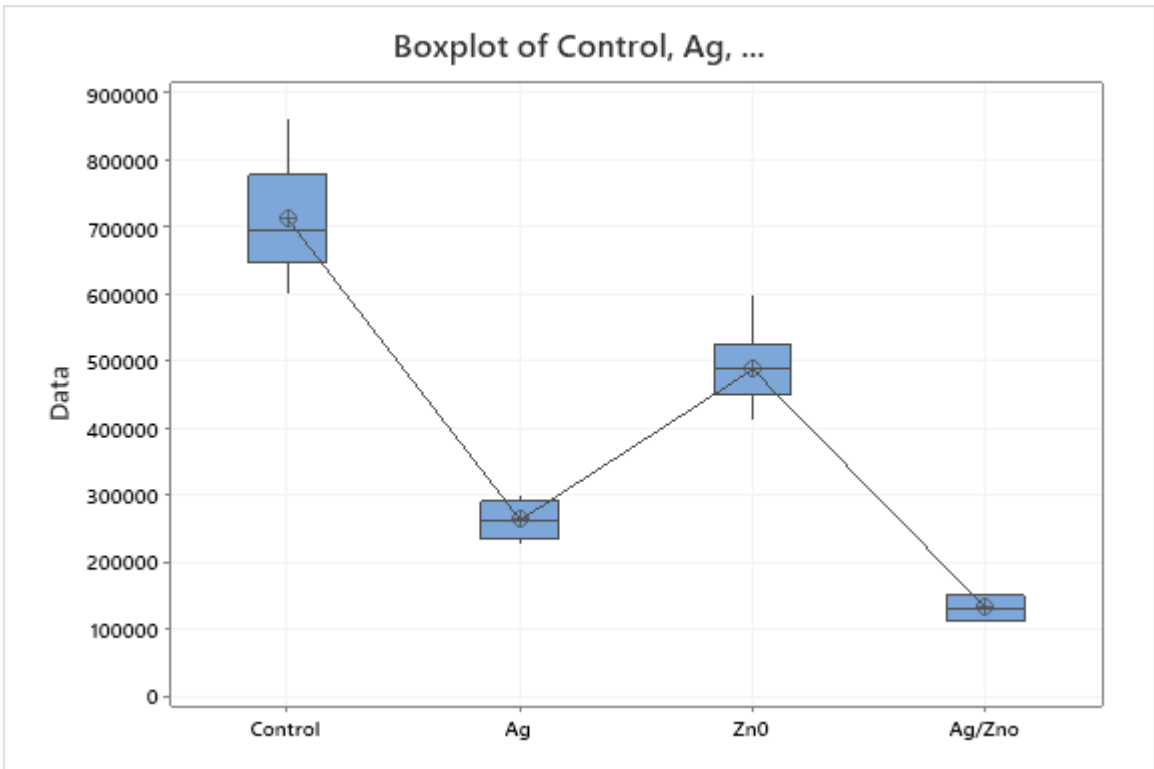

**Histogram**  
(responses are Control, Ag, ...)

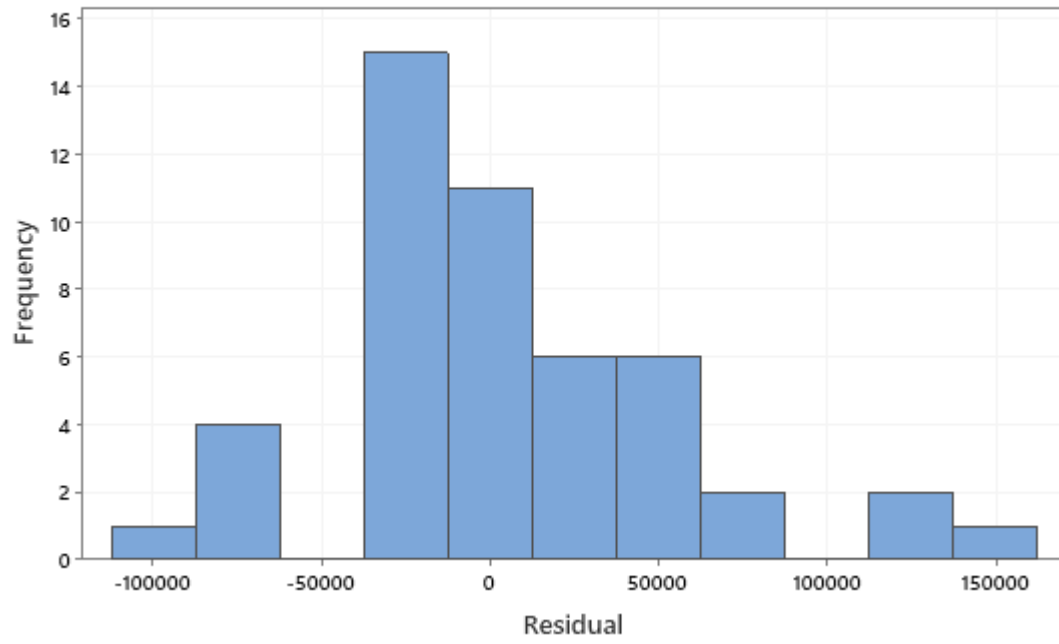

Supplement: MOESM4 [file 23144548]
