# Supplementary material for: The antibacterial effect of silver, zinc-oxide and combination of silver/ zinc oxide nanoparticles coating of orthodontic brackets (an in vitro study)
Source: PubMed Central journal article supplement (PMC9185939; doi:10.1186/s12903-022-02263-6), 2022-06-09

## Paired T-Test and CI: Zno\_lacto\_T1, Zno\_lacto\_T2

### Descriptive Statistics

| Sample       | N  | Mean  | StDev | SE Mean |
|--------------|----|-------|-------|---------|
| Zno_lacto_T1 | 12 | 28.85 | 8.98  | 2.59    |
| Zno_lacto_T2 | 12 | 31.58 | 8.09  | 2.34    |

### Estimation for Paired Difference

| 95% CI for |       |         |                  |
|------------|-------|---------|------------------|
| Mean       | StDev | SE Mean | $\mu$ difference |
| -2.73      | 12.76 | 3.68    | (-10.84, 5.37)   |

$\mu$  difference: population mean of (Zno\_lacto\_T1 - Zno\_lacto\_T2)

### Test

Null hypothesis  $H_0: \mu_{\text{difference}} = 0$   
 Alternative hypothesis  $H_1: \mu_{\text{difference}} \neq 0$

| T-Value | P-Value |
|---------|---------|
| -0.74   | 0.474   |

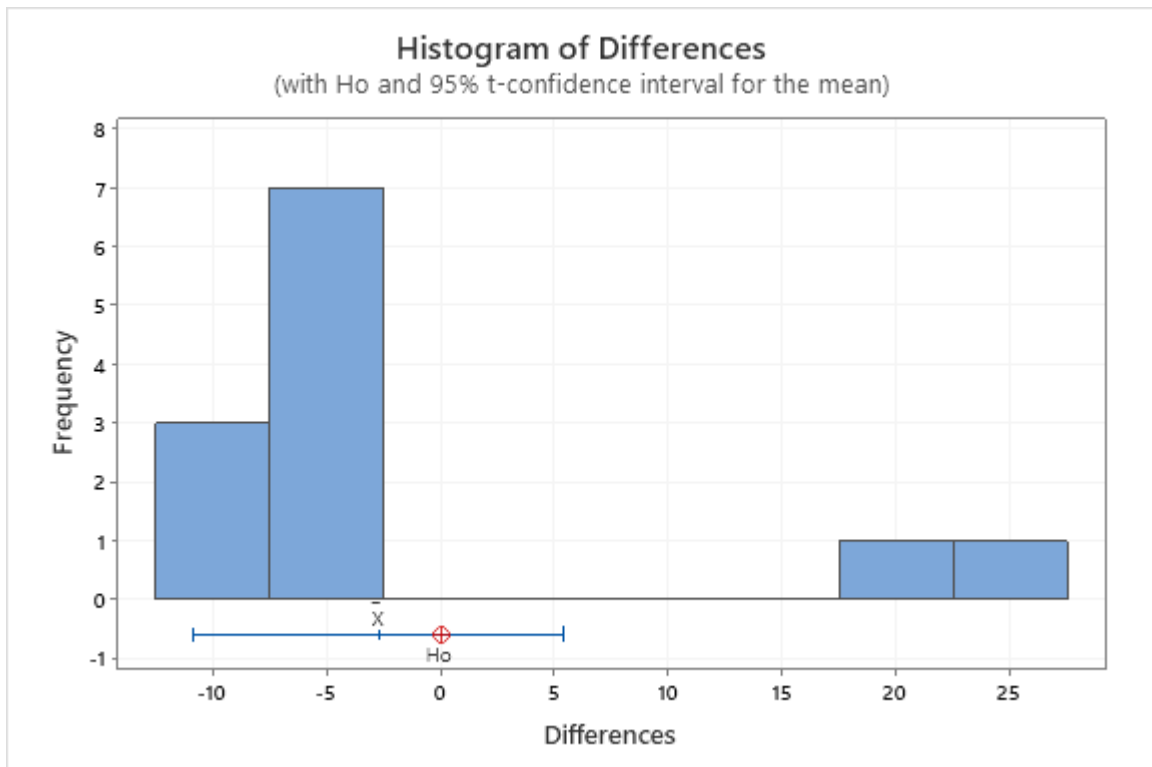

**Individual Value Plot of Differences**  
(with  $H_0$  and 95% t-confidence interval for the mean)

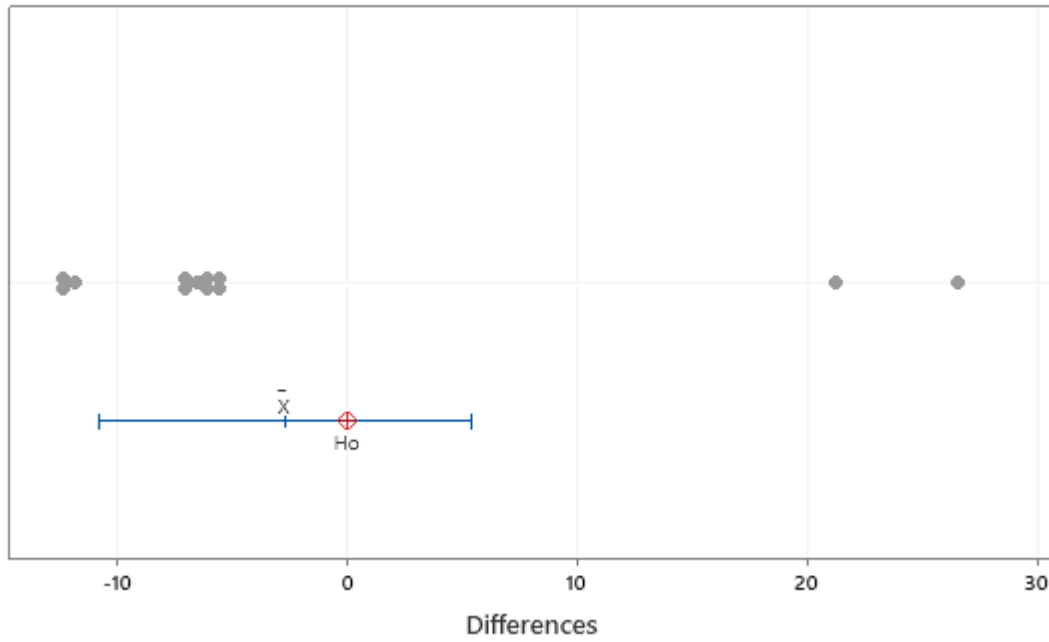

**Boxplot of Differences**  
(with  $H_0$  and 95% t-confidence interval for the mean)

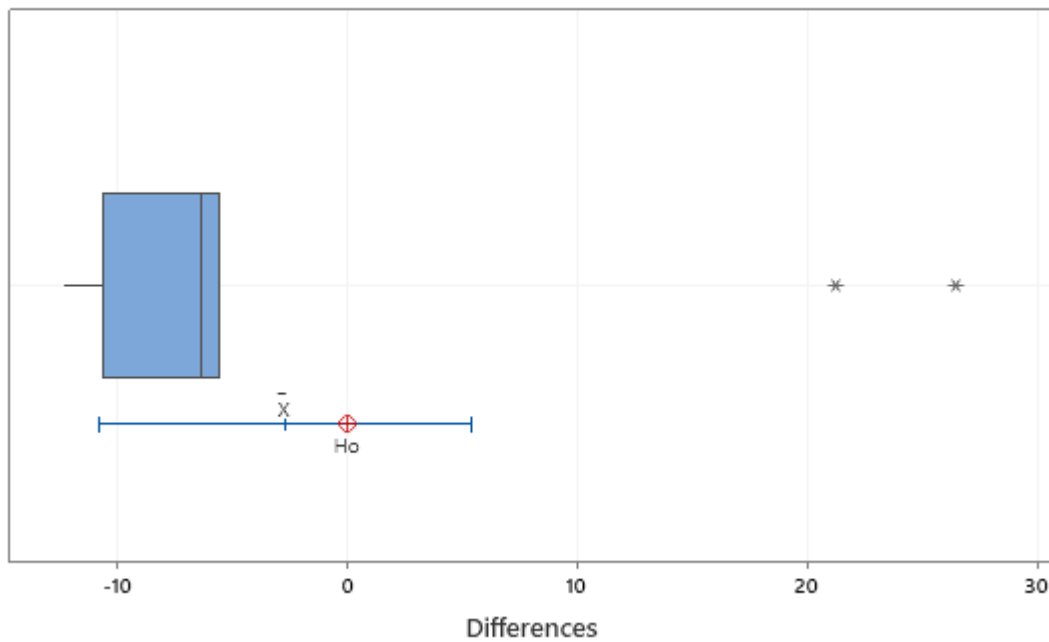

Supplement: 12903_2022_2263_MOESM15_ESM.pdf [file 12903_2022_2263_MOESM15_ESM.pdf]
