# Supplementary material for: The antibacterial effect of silver, zinc-oxide and combination of silver/ zinc oxide nanoparticles coating of orthodontic brackets (an in vitro study)
Source: Springer Nature journal article supplement (doi:10.1186/s12903-022-02263-6), 2022-06-09

## Paired T-Test and CI: Ag\_ST\_T1, Ag\_ST\_T2

### Descriptive Statistics

| Sample   | N  | Mean     | StDev  | SE Mean |
|----------|----|----------|--------|---------|
| Ag_ST_T1 | 12 | 10162500 | 281079 | 81141   |
| Ag_ST_T2 | 12 | 10066667 | 913866 | 263810  |

### Estimation for Paired Difference

| Mean  | StDev  | SE Mean | 95% CI for $\mu_{\text{difference}}$ |
|-------|--------|---------|--------------------------------------|
| 95833 | 989753 | 285717  | (-533026,<br>724693)                 |

$\mu_{\text{difference}}$ : population mean of (Ag\_ST\_T1 - Ag\_ST\_T2)

### Test

Null hypothesis  $H_0: \mu_{\text{difference}} = 0$   
 Alternative hypothesis  $H_1: \mu_{\text{difference}} \neq 0$

| T-Value | P-Value |
|---------|---------|
| 0.34    | 0.744   |

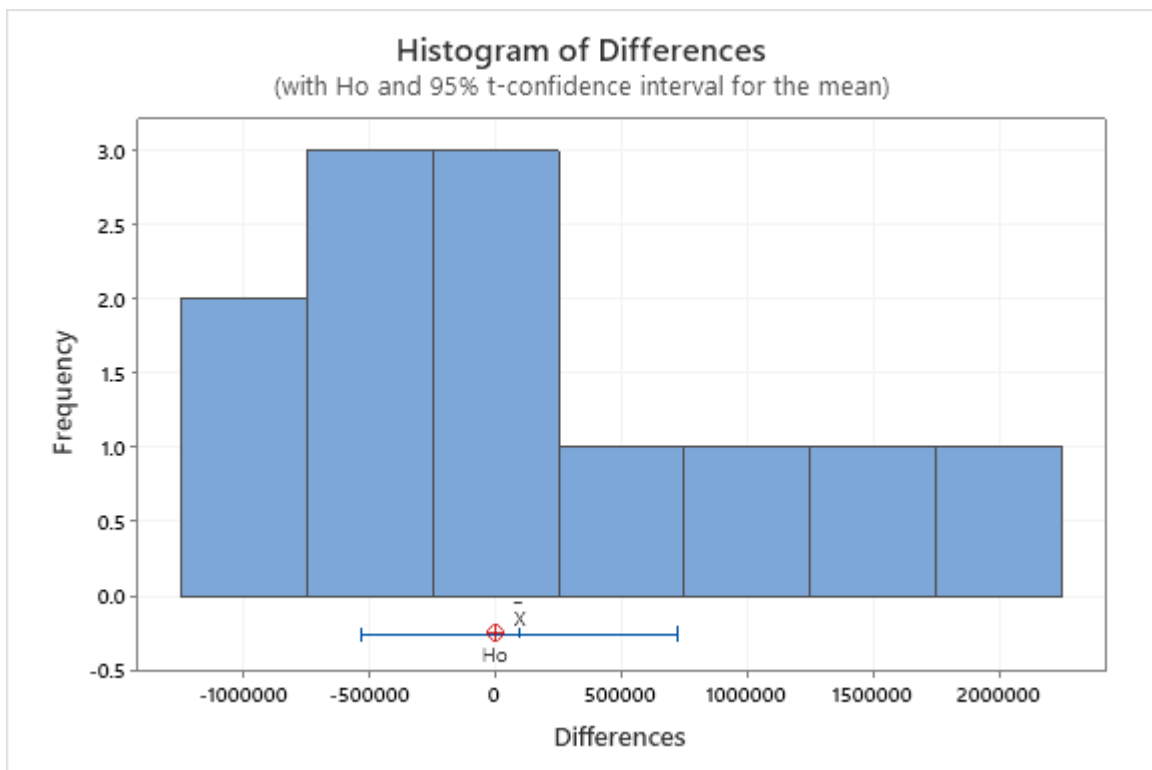

**Individual Value Plot of Differences**  
(with  $H_0$  and 95% t-confidence interval for the mean)

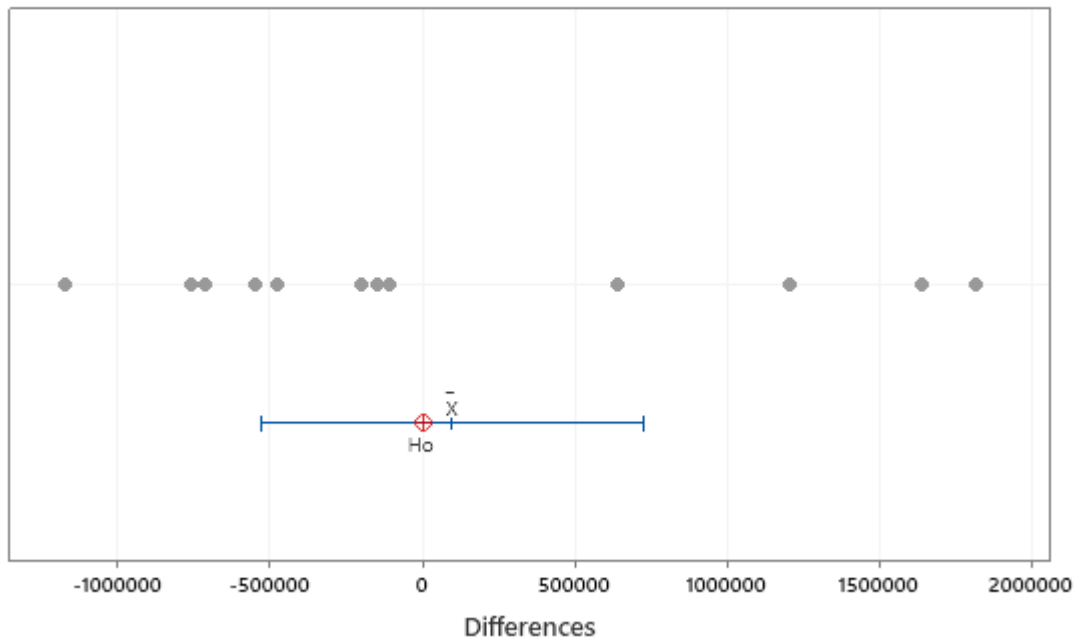

**Boxplot of Differences**  
(with  $H_0$  and 95% t-confidence interval for the mean)

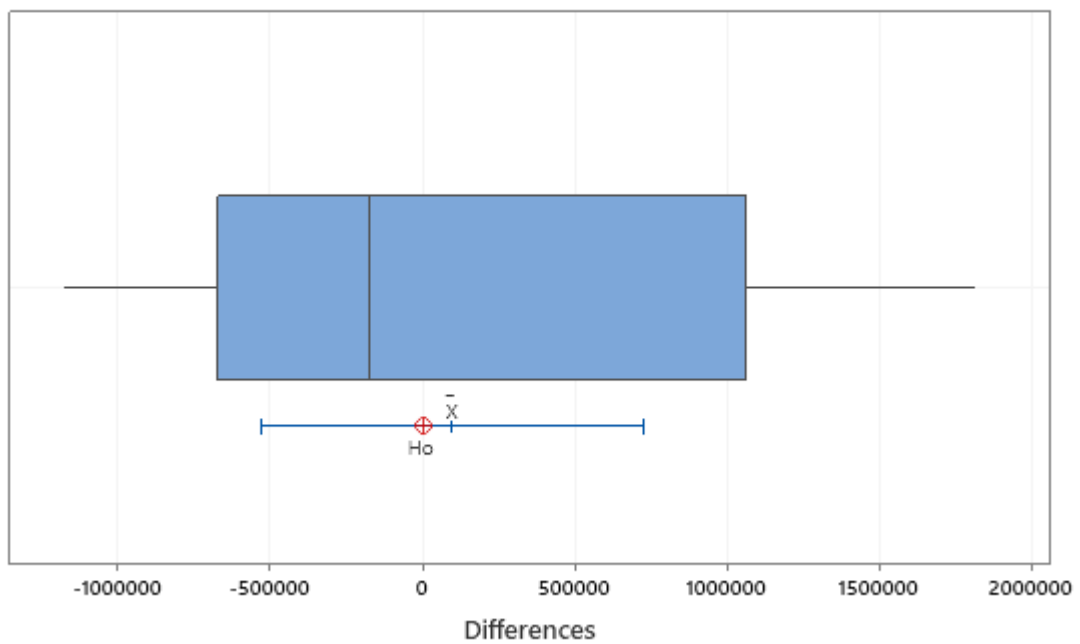

Supplement: MOESM5 [file 23144548]
