# Supplementary material for: The antibacterial effect of silver, zinc-oxide and combination of silver/ zinc oxide nanoparticles coating of orthodontic brackets (an in vitro study)
Source: Springer Nature journal article supplement (doi:10.1186/s12903-022-02263-6), 2022-06-09

## Paired T-Test and CI: zno\_ST\_T1, zno\_ST\_T2

### Descriptive Statistics

| Sample    | N  | Mean     | StDev  | SE Mean |
|-----------|----|----------|--------|---------|
| zno_ST_T1 | 12 | 11575000 | 630814 | 182100  |
| zno_ST_T2 | 12 | 11220000 | 997287 | 287892  |

### Estimation for Paired Difference

| Mean   | StDev   | SE Mean | 95% CI for $\mu_{\text{difference}}$ |
|--------|---------|---------|--------------------------------------|
| 355000 | 1450489 | 418720  | (-566596, 1276596)                   |

$\mu_{\text{difference}}$ : population mean of (zno\_ST\_T1 - zno\_ST\_T2)

### Test

Null hypothesis  $H_0: \mu_{\text{difference}} = 0$   
 Alternative hypothesis  $H_1: \mu_{\text{difference}} \neq 0$

| T-Value | P-Value |
|---------|---------|
| 0.85    | 0.415   |

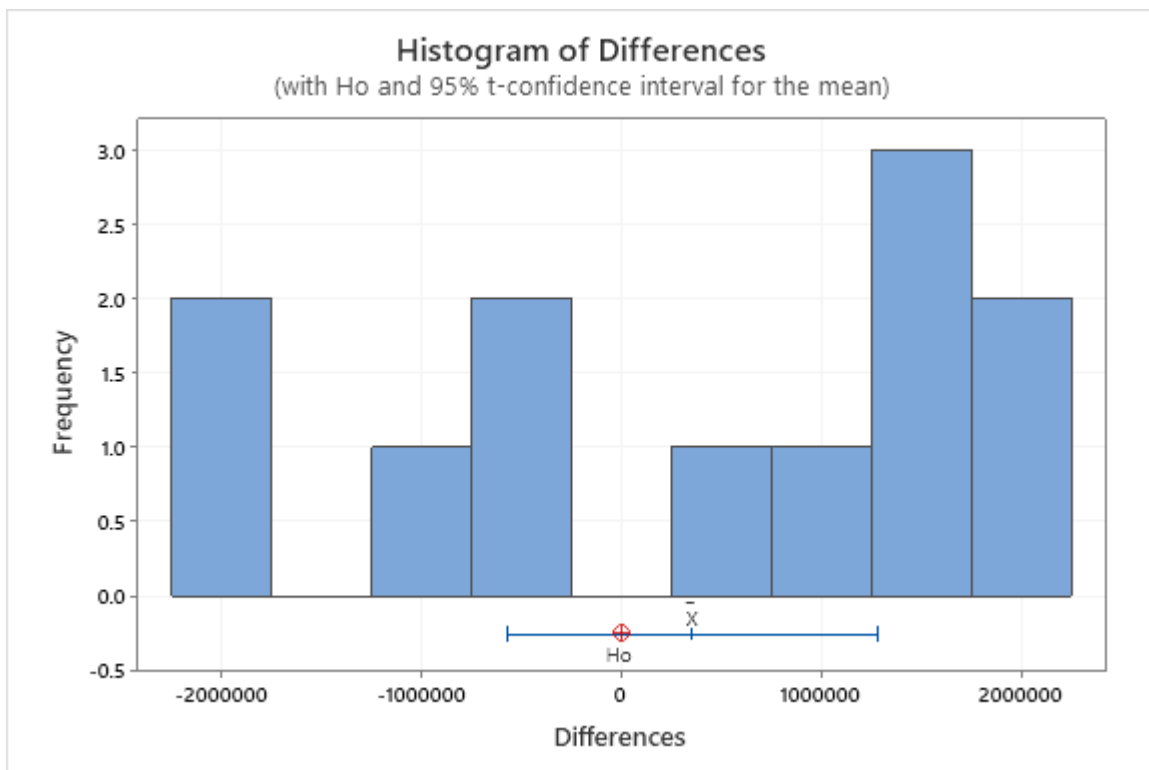

**Individual Value Plot of Differences**  
(with  $H_0$  and 95% t-confidence interval for the mean)

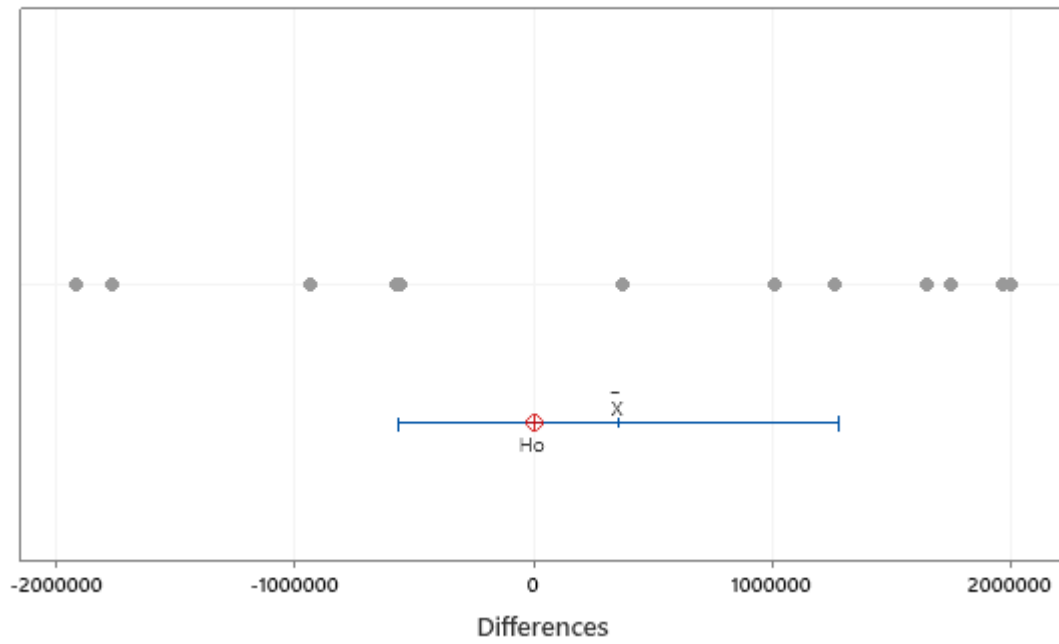

**Boxplot of Differences**  
(with  $H_0$  and 95% t-confidence interval for the mean)

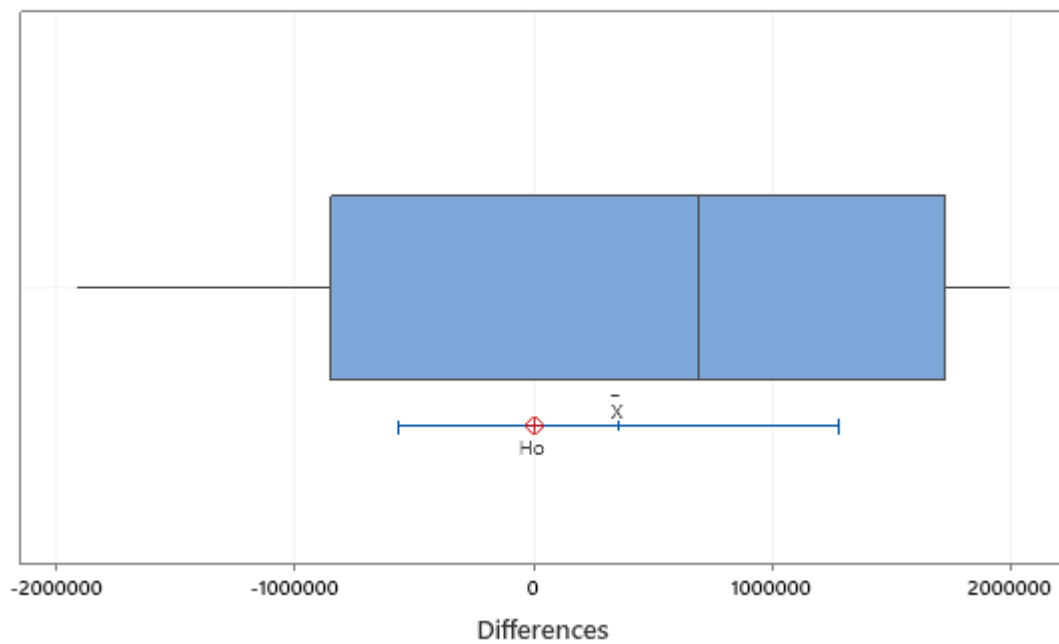

Supplement: MOESM6 [file 23144548]
