# Supplementary material for: The antibacterial effect of silver, zinc-oxide and combination of silver/ zinc oxide nanoparticles coating of orthodontic brackets (an in vitro study)
Source: Springer Nature journal article supplement (doi:10.1186/s12903-022-02263-6), 2022-06-09

## Paired T-Test and CI: zno+Ag\_strept\_T1, zno+Ag\_strepto\_T2

### Descriptive Statistics

| Sample            | N  | Mean    | StDev  | SE Mean |
|-------------------|----|---------|--------|---------|
| zno+Ag_strept_T1  | 12 | 7675000 | 738376 | 213151  |
| zno+Ag_strepto_T2 | 12 | 7520000 | 705717 | 203723  |

### Estimation for Paired Difference

| Mean   | StDev  | SE Mean | 95% CI for $\mu_{\text{difference}}$ |
|--------|--------|---------|--------------------------------------|
| 155000 | 528771 | 152643  | (-180965, 490965)                    |

$\mu_{\text{difference}}$ : population mean of (zno+Ag\_strept\_T1 - zno+Ag\_strepto\_T2)

### Test

Null hypothesis  $H_0: \mu_{\text{difference}} = 0$   
 Alternative hypothesis  $H_1: \mu_{\text{difference}} \neq 0$

| T-Value | P-Value |
|---------|---------|
| 1.02    | 0.332   |

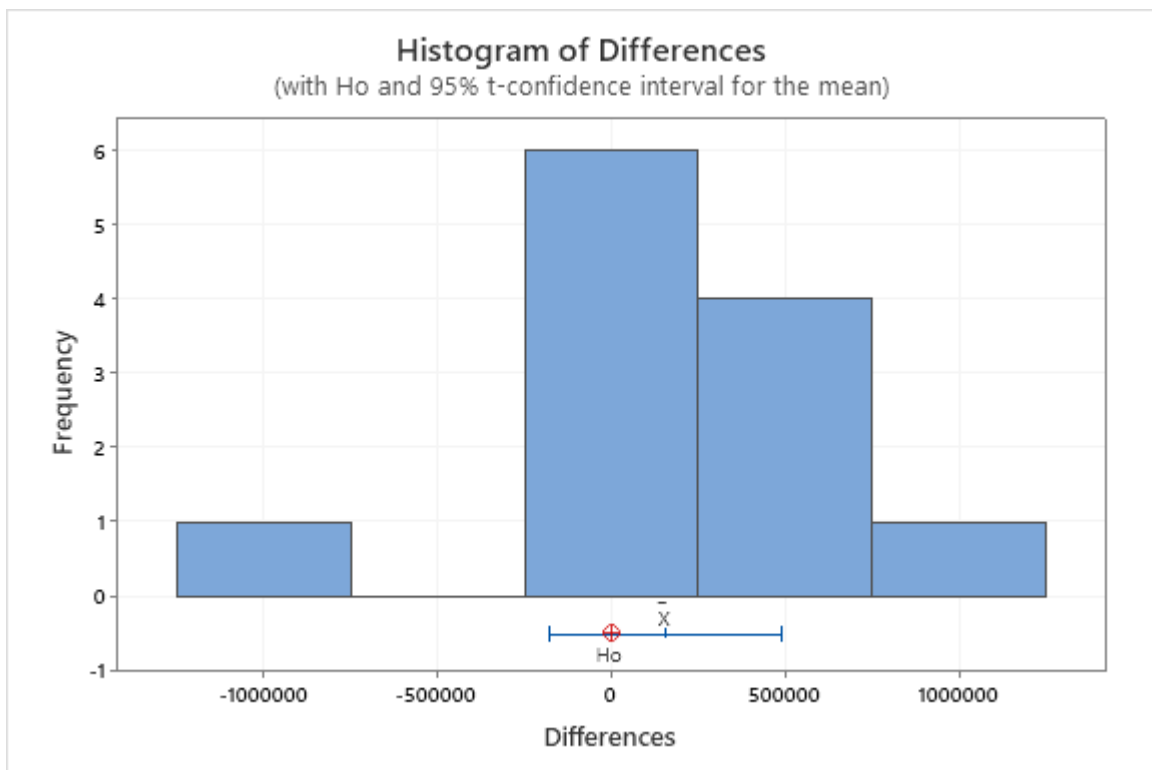

**Individual Value Plot of Differences**  
(with  $H_0$  and 95% t-confidence interval for the mean)

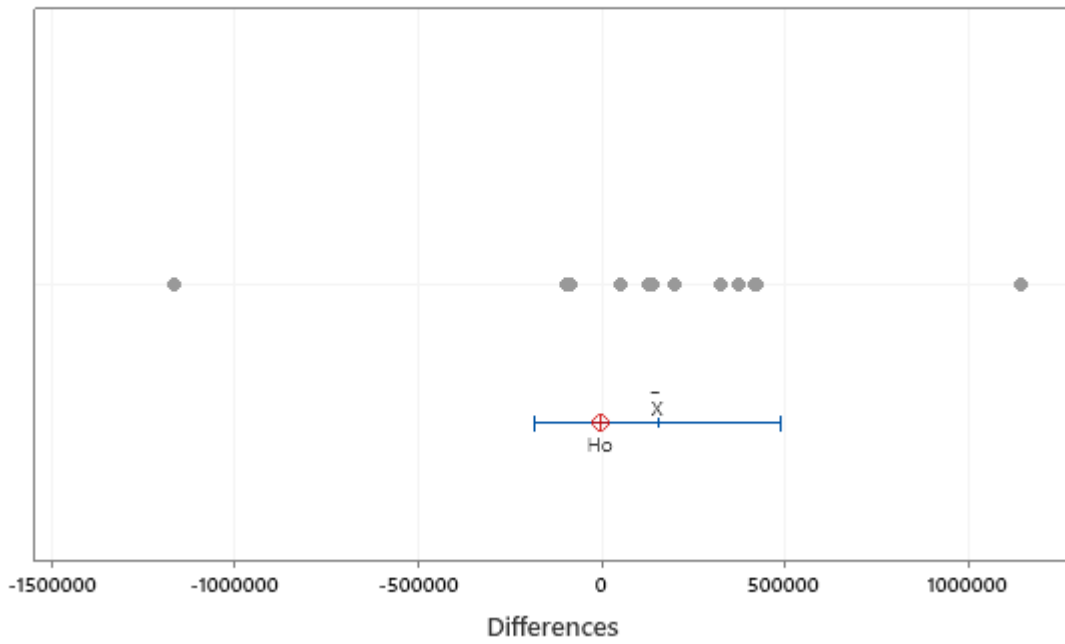

**Boxplot of Differences**  
(with  $H_0$  and 95% t-confidence interval for the mean)

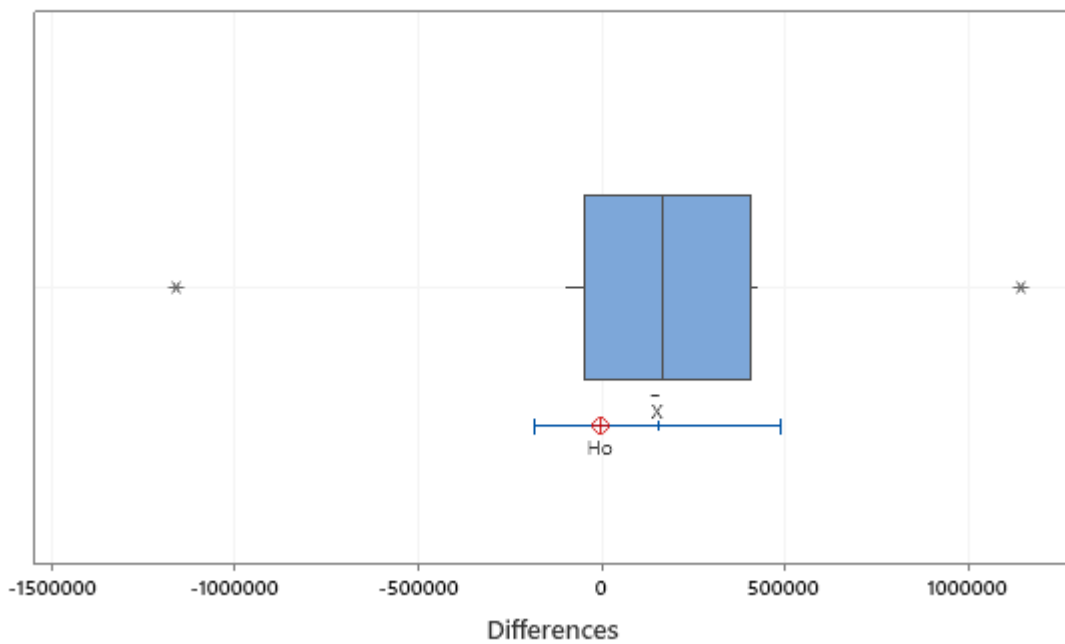

Supplement: MOESM7 [file 23144548]
