# Supplementary material for: The antibacterial effect of silver, zinc-oxide and combination of silver/ zinc oxide nanoparticles coating of orthodontic brackets (an in vitro study)
Source: Springer Nature journal article supplement (doi:10.1186/s12903-022-02263-6), 2022-06-09

## Paired T-Test and CI: Ag\_strept\_T1, Ag\_strepto\_T2

### Descriptive Statistics

| Sample        | N  | Mean  | StDev | SE Mean |
|---------------|----|-------|-------|---------|
| Ag_strept_T1  | 12 | 27.60 | 2.00  | 0.58    |
| Ag_strepto_T2 | 12 | 24.08 | 6.89  | 1.99    |

### Estimation for Paired Difference

| 95% CI for |       |         |                           |  |
|------------|-------|---------|---------------------------|--|
| Mean       | StDev | SE Mean | $\mu_{\text{difference}}$ |  |
| 3.52       | 7.42  | 2.14    | (-1.19, 8.24)             |  |

$\mu_{\text{difference}}$ : population mean of (Ag\_strept\_T1 - Ag\_strepto\_T2)

### Test

|                        |                                       |
|------------------------|---------------------------------------|
| Null hypothesis        | $H_0: \mu_{\text{difference}} = 0$    |
| Alternative hypothesis | $H_1: \mu_{\text{difference}} \neq 0$ |

| T-Value | P-Value |
|---------|---------|
| 1.64    | 0.128   |

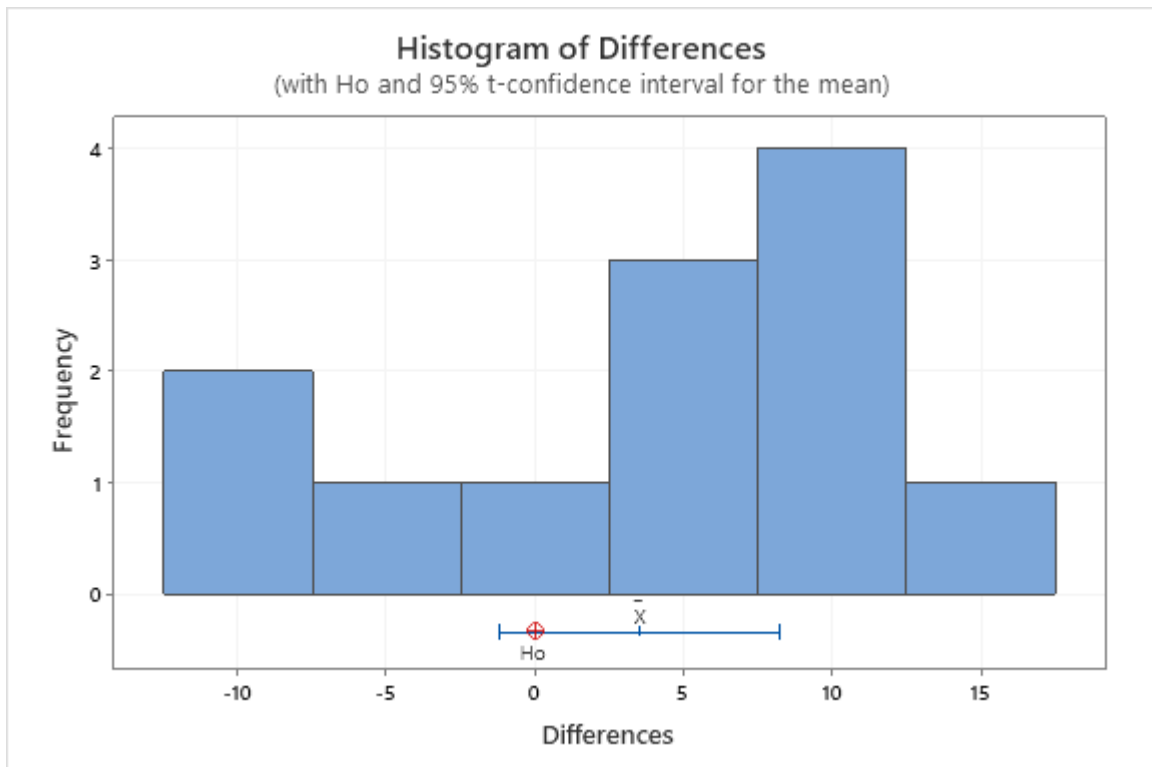

**Individual Value Plot of Differences**  
(with  $H_0$  and 95% t-confidence interval for the mean)

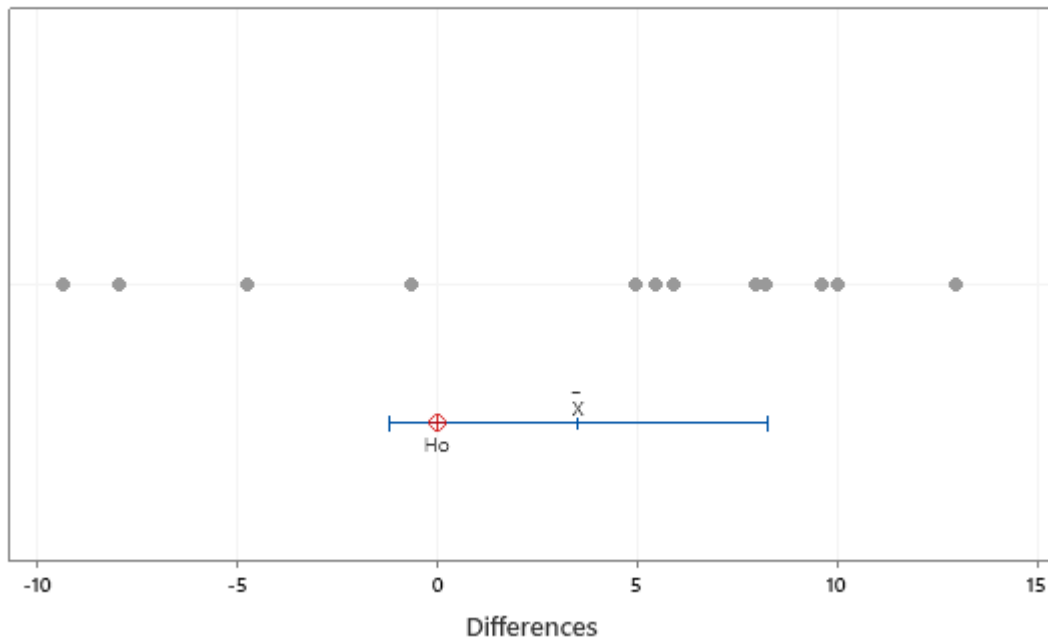

**Boxplot of Differences**  
(with  $H_0$  and 95% t-confidence interval for the mean)

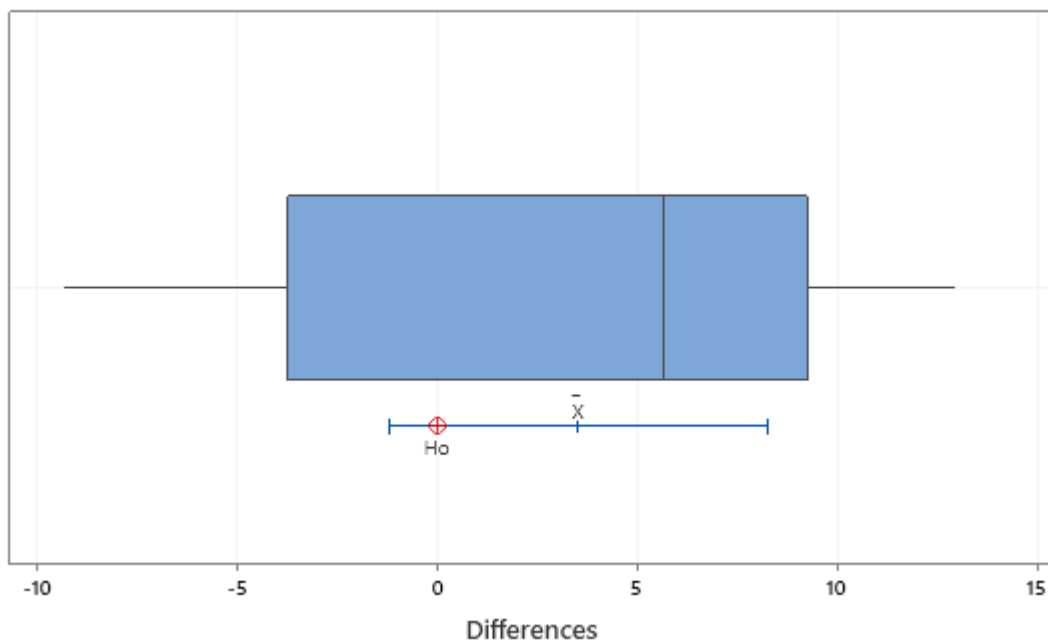

Supplement: MOESM8 [file 23144548]
