# Supplementary material for: The antibacterial effect of silver, zinc-oxide and combination of silver/ zinc oxide nanoparticles coating of orthodontic brackets (an in vitro study)
Source: Springer Nature journal article supplement (doi:10.1186/s12903-022-02263-6), 2022-06-09

## Paired T-Test and CI: zno\_strept\_T1, zno\_strepto\_T2

### Descriptive Statistics

| Sample         | N  | Mean  | StDev | SE Mean |
|----------------|----|-------|-------|---------|
| zno_strept_T1  | 12 | 17.54 | 4.49  | 1.30    |
| zno_strepto_T2 | 12 | 15.38 | 7.52  | 2.17    |

### Estimation for Paired Difference

| 95% CI for |       |         |                           |  |
|------------|-------|---------|---------------------------|--|
| Mean       | StDev | SE Mean | $\mu_{\text{difference}}$ |  |
| 2.16       | 10.72 | 3.10    | (-4.66, 8.97)             |  |

$\mu_{\text{difference}}$ : population mean of (zno\_strept\_T1 - zno\_strepto\_T2)

### Test

Null hypothesis  $H_0: \mu_{\text{difference}} = 0$   
 Alternative hypothesis  $H_1: \mu_{\text{difference}} \neq 0$

| T-Value | P-Value |
|---------|---------|
| 0.70    | 0.500   |

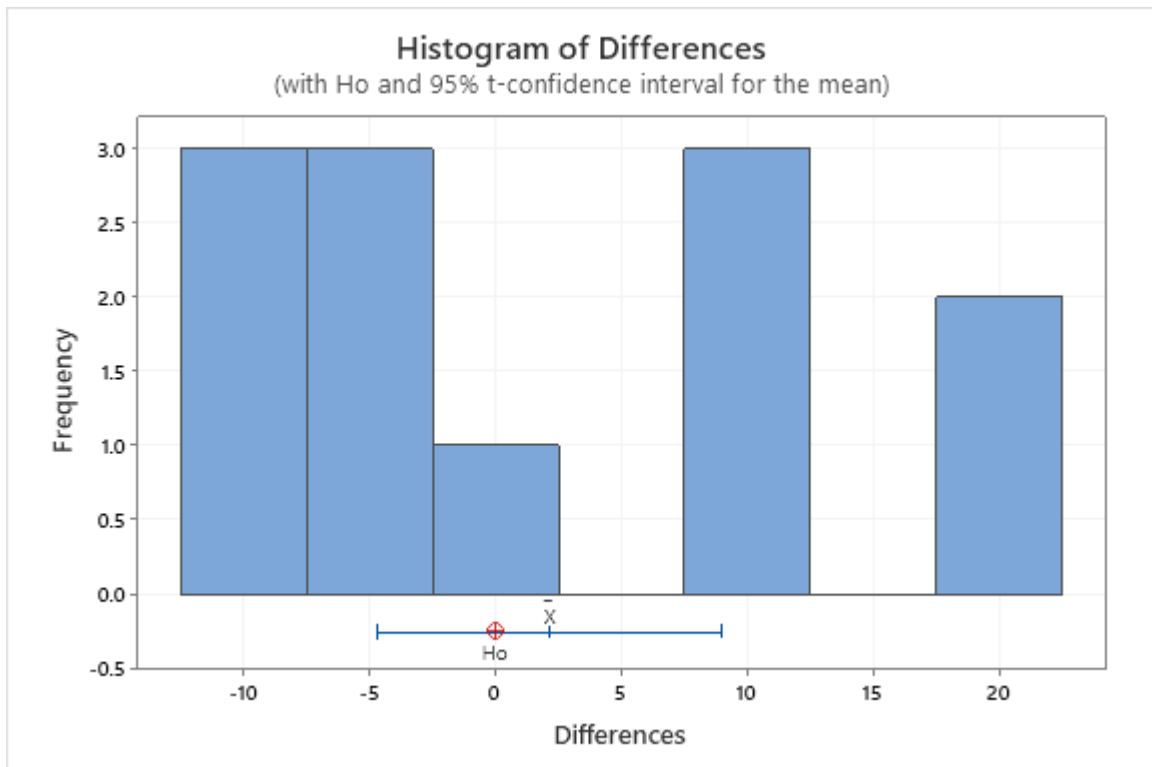

**Individual Value Plot of Differences**  
(with  $H_0$  and 95% t-confidence interval for the mean)

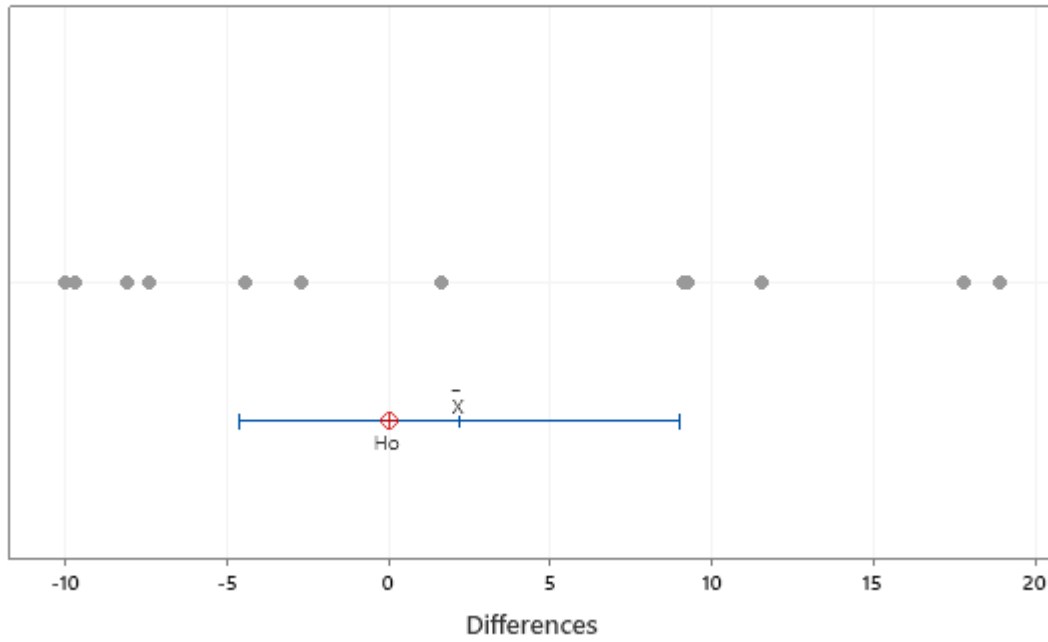

**Boxplot of Differences**  
(with  $H_0$  and 95% t-confidence interval for the mean)

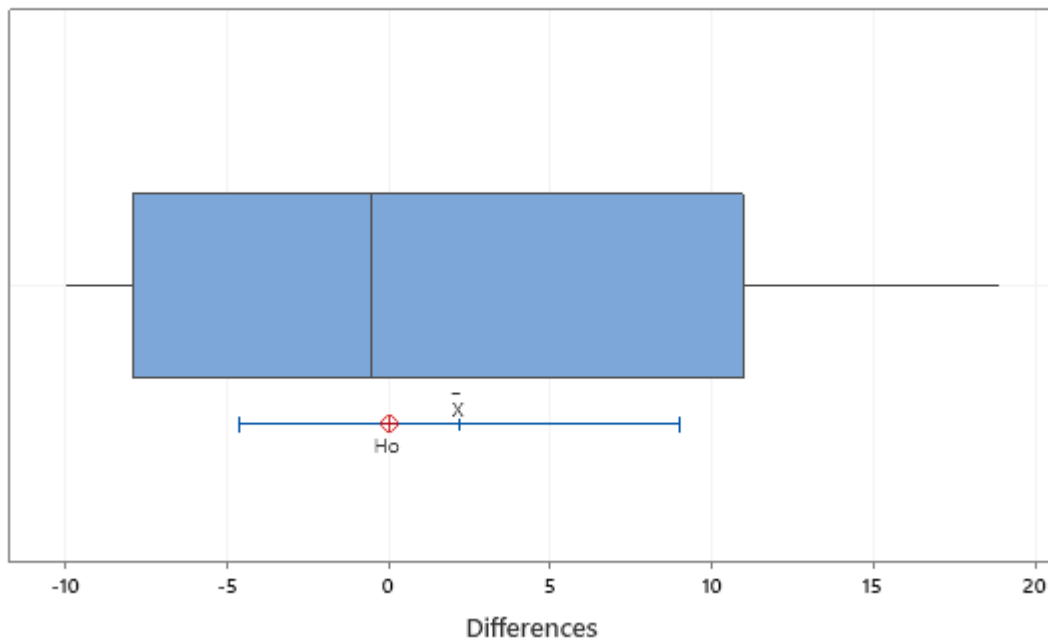

Supplement: MOESM9 [file 23144548]
