# Supplementary material for: The antibacterial effect of silver, zinc-oxide and combination of silver/ zinc oxide nanoparticles coating of orthodontic brackets (an in vitro study)
Source: Springer Nature journal article supplement (doi:10.1186/s12903-022-02263-6), 2022-06-09

## Paired T-Test and CI: zno+Ag\_strept\_T1, zno+Ag\_strepto\_T2

### Descriptive Statistics

| Sample            | N  | Mean  | StDev | SE Mean |
|-------------------|----|-------|-------|---------|
| zno+Ag_strept_T1  | 12 | 45.33 | 5.26  | 1.52    |
| zno+Ag_strepto_T2 | 12 | 43.29 | 5.32  | 1.54    |

### Estimation for Paired Difference

| 95% CI for |       |         |                           |
|------------|-------|---------|---------------------------|
| Mean       | StDev | SE Mean | $\mu_{\text{difference}}$ |
| 2.04       | 3.87  | 1.12    | (-0.42, 4.50)             |

$\mu_{\text{difference}}$ : population mean of (zno+Ag\_strept\_T1 - zno+Ag\_strepto\_T2)

### Test

Null hypothesis  $H_0: \mu_{\text{difference}} = 0$

Alternative hypothesis  $H_1: \mu_{\text{difference}} \neq 0$

| T-Value | P-Value |
|---------|---------|
| 1.82    | 0.095   |

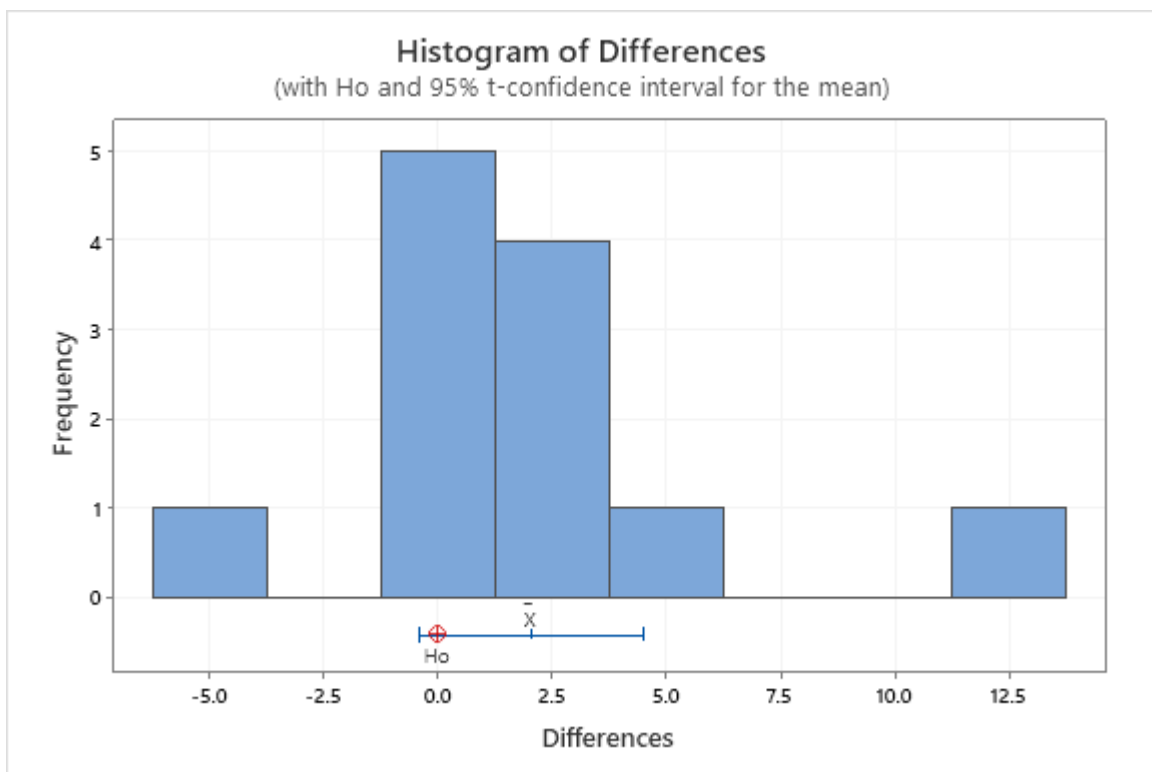

**Individual Value Plot of Differences**  
(with  $H_0$  and 95% t-confidence interval for the mean)

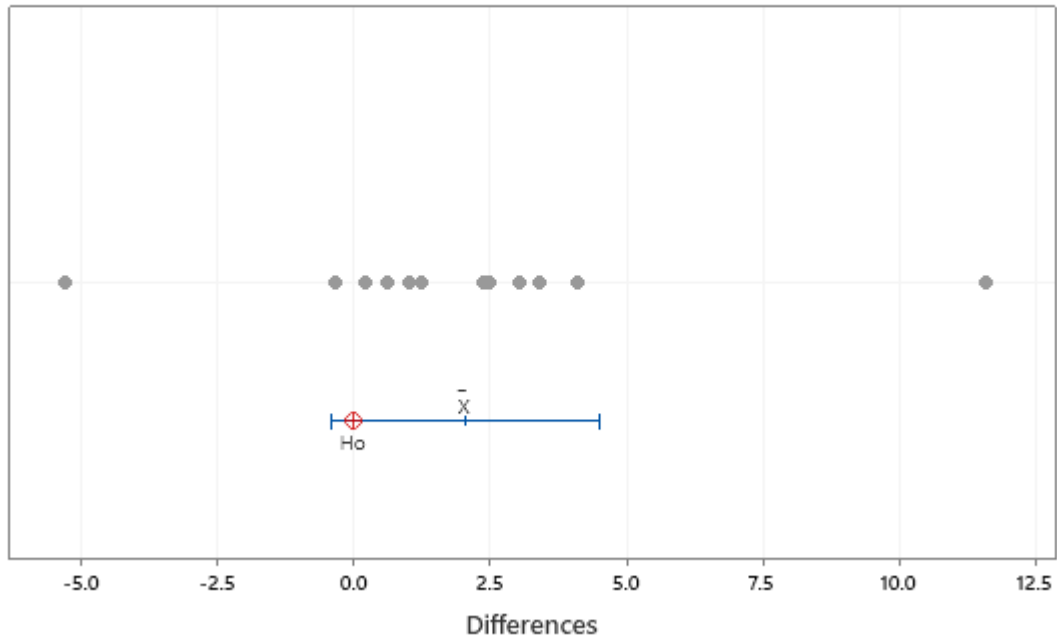

**Boxplot of Differences**  
(with  $H_0$  and 95% t-confidence interval for the mean)

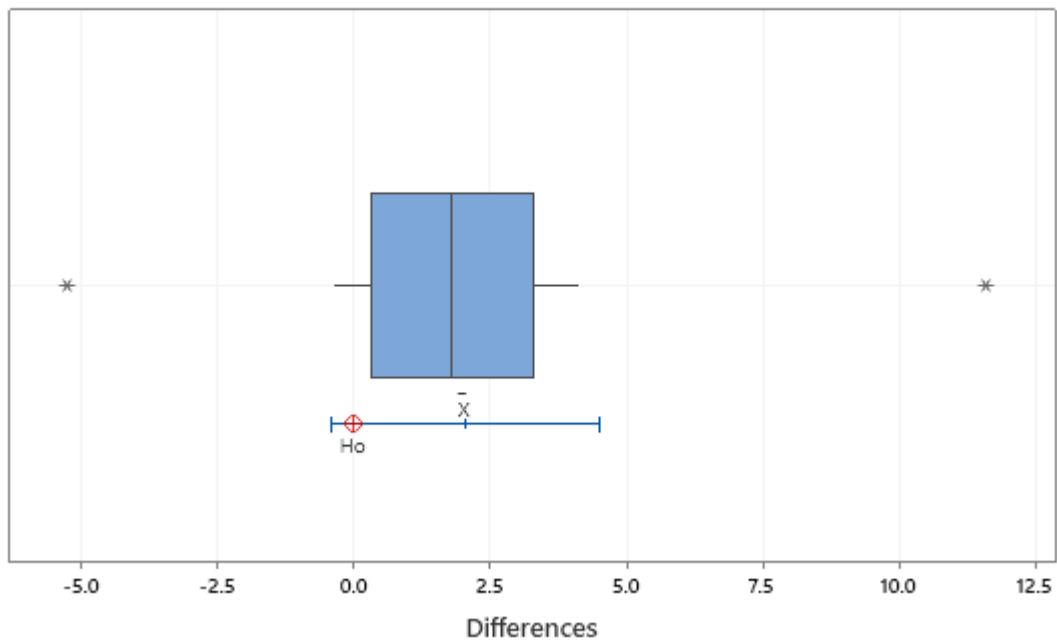

Supplement: MOESM10 [file 23144548]
