# Supplementary material for: The antibacterial effect of silver, zinc-oxide and combination of silver/ zinc oxide nanoparticles coating of orthodontic brackets (an in vitro study)
Source: Springer Nature journal article supplement (doi:10.1186/s12903-022-02263-6), 2022-06-09

## Paired T-Test and CI: Ag\_lacto\_T1, Ag\_lacto\_T2

### Descriptive Statistics

| Sample      | N  | Mean   | StDev | SE Mean |
|-------------|----|--------|-------|---------|
| Ag_lacto_T1 | 12 | 246875 | 33763 | 9746    |
| Ag_lacto_T2 | 12 | 262500 | 27696 | 7995    |

### Estimation for Paired Difference

| 95% CI for |       |         |                           |  |
|------------|-------|---------|---------------------------|--|
| Mean       | StDev | SE Mean | $\mu_{\text{difference}}$ |  |
| -15625     | 37358 | 10784   | (-39361, 8111)            |  |

$\mu_{\text{difference}}$ : population mean of (Ag\_lacto\_T1 - Ag\_lacto\_T2)

### Test

Null hypothesis  $H_0: \mu_{\text{difference}} = 0$   
 Alternative hypothesis  $H_1: \mu_{\text{difference}} \neq 0$

| T-Value | P-Value |
|---------|---------|
| -1.45   | 0.175   |

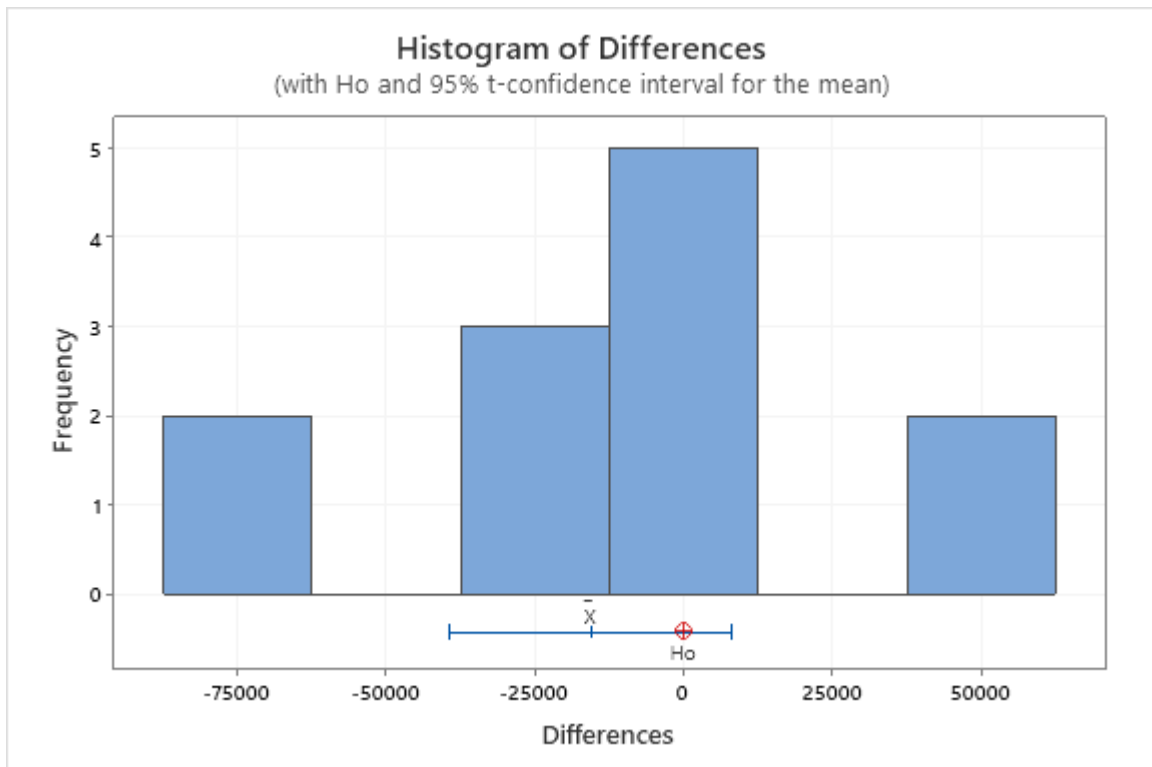

**Individual Value Plot of Differences**  
(with  $H_0$  and 95% t-confidence interval for the mean)

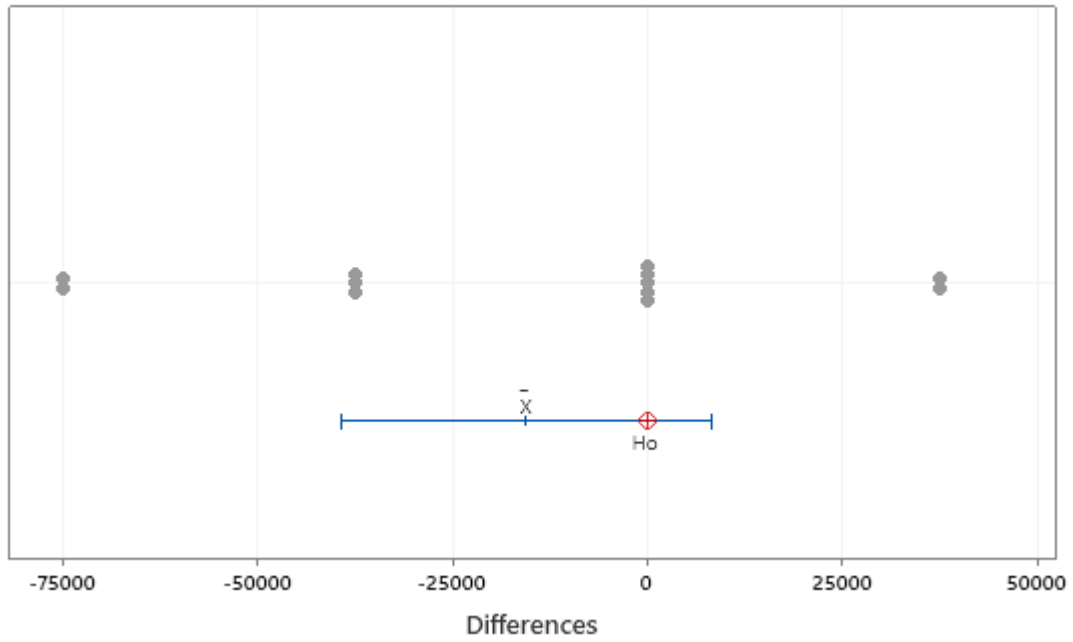

**Boxplot of Differences**  
(with  $H_0$  and 95% t-confidence interval for the mean)

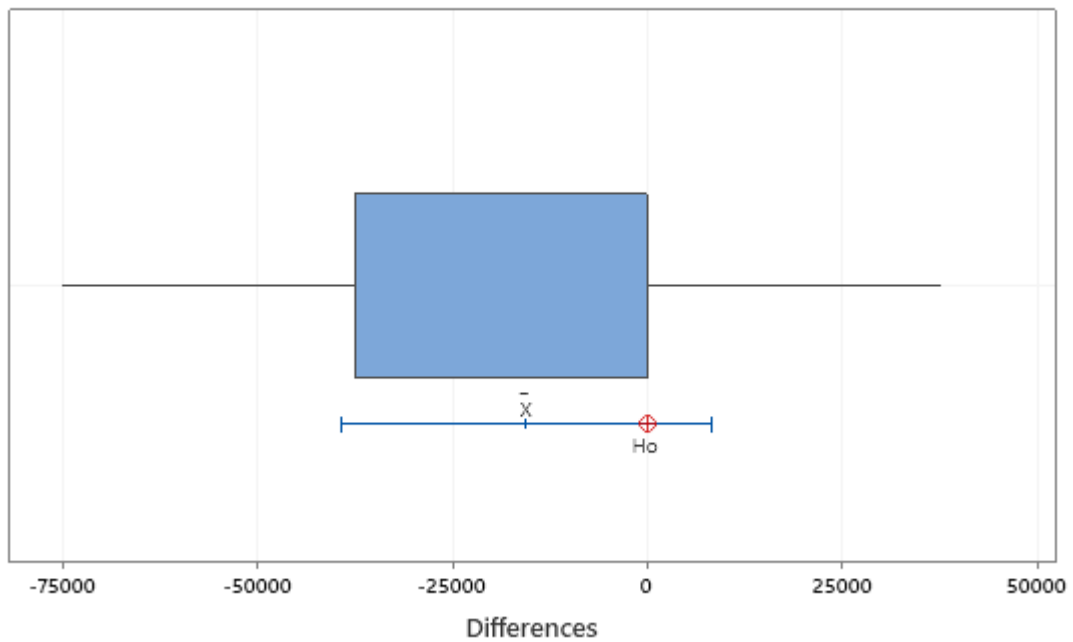

Supplement: MOESM11 [file 23144548]
