# Supplementary material for: The antibacterial effect of silver, zinc-oxide and combination of silver/ zinc oxide nanoparticles coating of orthodontic brackets (an in vitro study)
Source: Springer Nature journal article supplement (doi:10.1186/s12903-022-02263-6), 2022-06-09

## Paired T-Test and CI: zno\_lacto\_T1, zno\_lacto\_T2

### Descriptive Statistics

| Sample       | N  | Mean   | StDev | SE Mean |
|--------------|----|--------|-------|---------|
| zno_lacto_T1 | 12 | 462500 | 58387 | 16855   |
| zno_lacto_T2 | 12 | 487500 | 57653 | 16643   |

### Estimation for Paired Difference

| Mean   | StDev | SE Mean | 95% CI for $\mu_{\text{difference}}$ |
|--------|-------|---------|--------------------------------------|
| -25000 | 86603 | 25000   | (-80025, 30025)                      |

$\mu_{\text{difference}}$ : population mean of (zno\_lacto\_T1 - zno\_lacto\_T2)

### Test

Null hypothesis  $H_0: \mu_{\text{difference}} = 0$   
 Alternative hypothesis  $H_1: \mu_{\text{difference}} \neq 0$

| T-Value | P-Value |
|---------|---------|
| -1.00   | 0.339   |

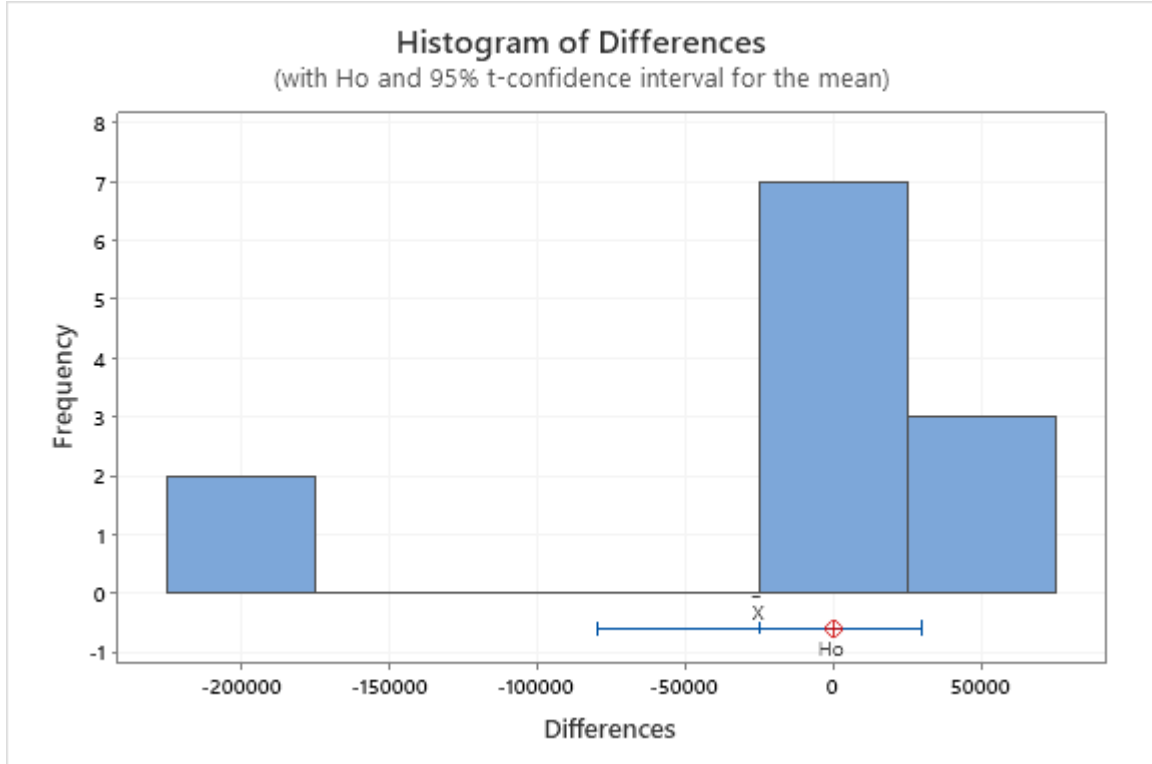

**Individual Value Plot of Differences**  
(with  $H_0$  and 95% t-confidence interval for the mean)

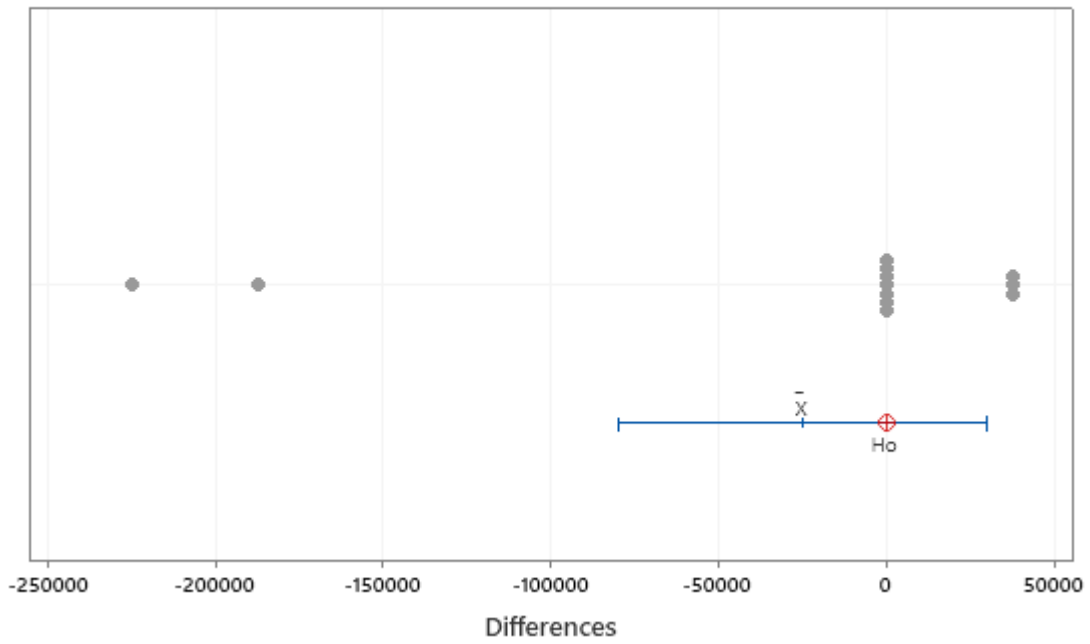

**Boxplot of Differences**  
(with  $H_0$  and 95% t-confidence interval for the mean)

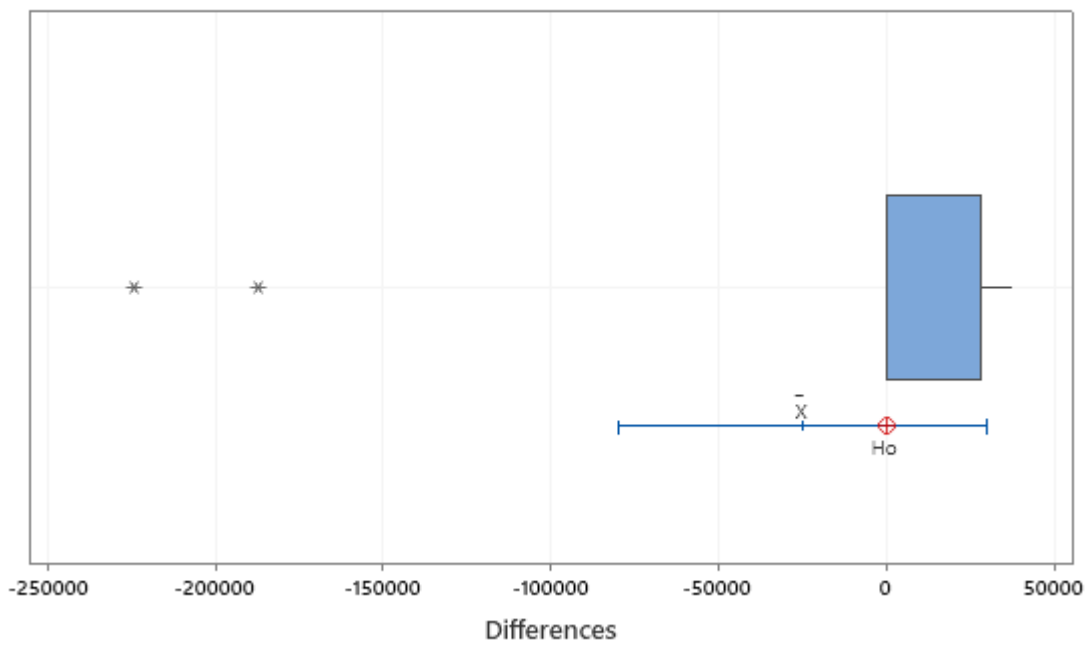

Supplement: MOESM12 [file 23144548]
