# Supplementary material for: The antibacterial effect of silver, zinc-oxide and combination of silver/ zinc oxide nanoparticles coating of orthodontic brackets (an in vitro study)
Source: Springer Nature journal article supplement (doi:10.1186/s12903-022-02263-6), 2022-06-09

## Paired T-Test and CI: zno+Ag\_lacto\_T1, zno+Ag\_lacto\_T2

### Descriptive Statistics

| Sample          | N  | Mean   | StDev | SE Mean |
|-----------------|----|--------|-------|---------|
| zno+Ag_lacto_T1 | 12 | 128125 | 19310 | 5574    |
| zno+Ag_lacto_T2 | 12 | 131250 | 19584 | 5653    |

### Estimation for Paired Difference

| Mean  | StDev | SE Mean | 95% CI for $\mu_{\text{difference}}$ |
|-------|-------|---------|--------------------------------------|
| -3125 | 25071 | 7237    | (-19054, 12804)                      |

$\mu_{\text{difference}}$ : population mean of (zno+Ag\_lacto\_T1 - zno+Ag\_lacto\_T2)

### Test

|                        |                                       |
|------------------------|---------------------------------------|
| Null hypothesis        | $H_0: \mu_{\text{difference}} = 0$    |
| Alternative hypothesis | $H_1: \mu_{\text{difference}} \neq 0$ |

| T-Value | P-Value |
|---------|---------|
| -0.43   | 0.674   |

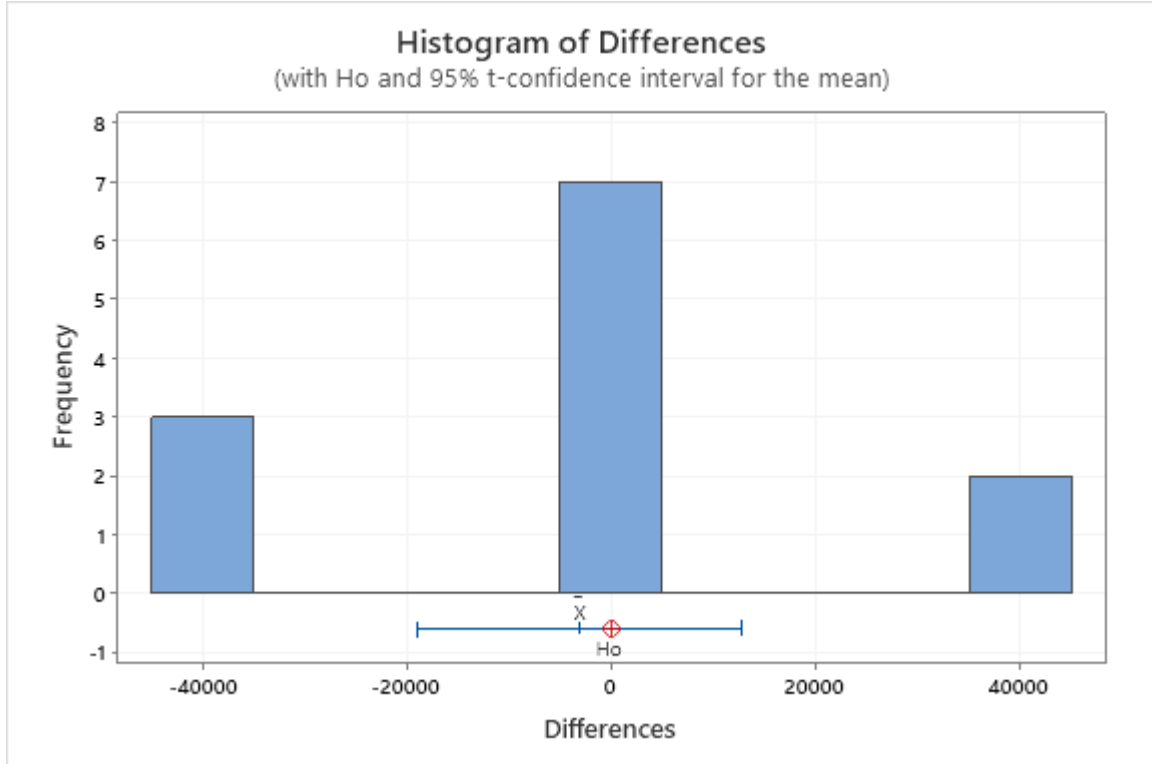

**Individual Value Plot of Differences**  
(with  $H_0$  and 95% t-confidence interval for the mean)

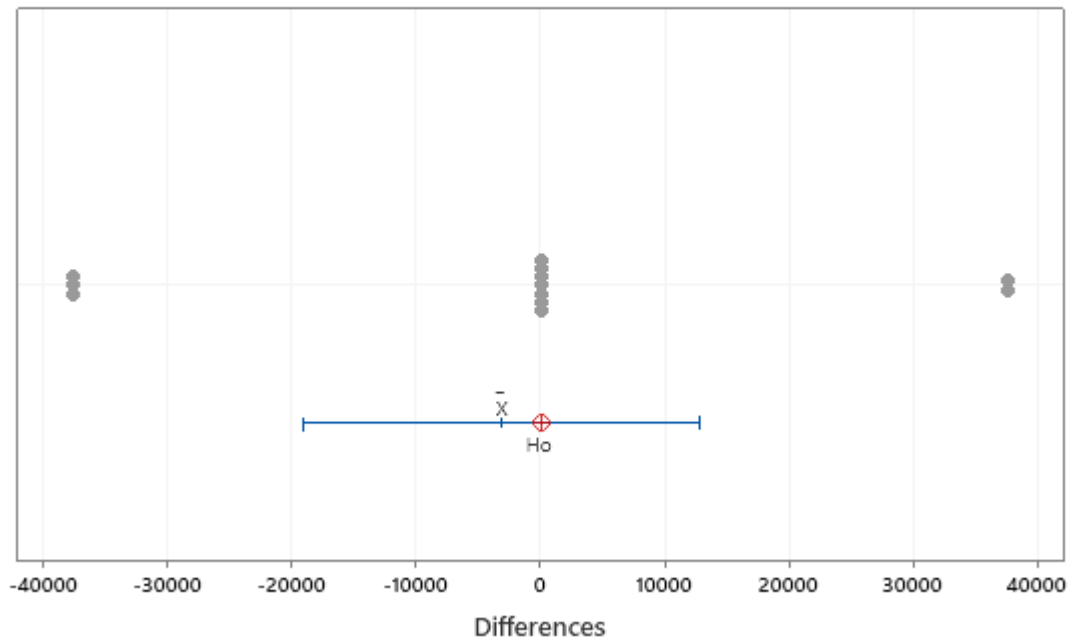

**Boxplot of Differences**  
(with  $H_0$  and 95% t-confidence interval for the mean)

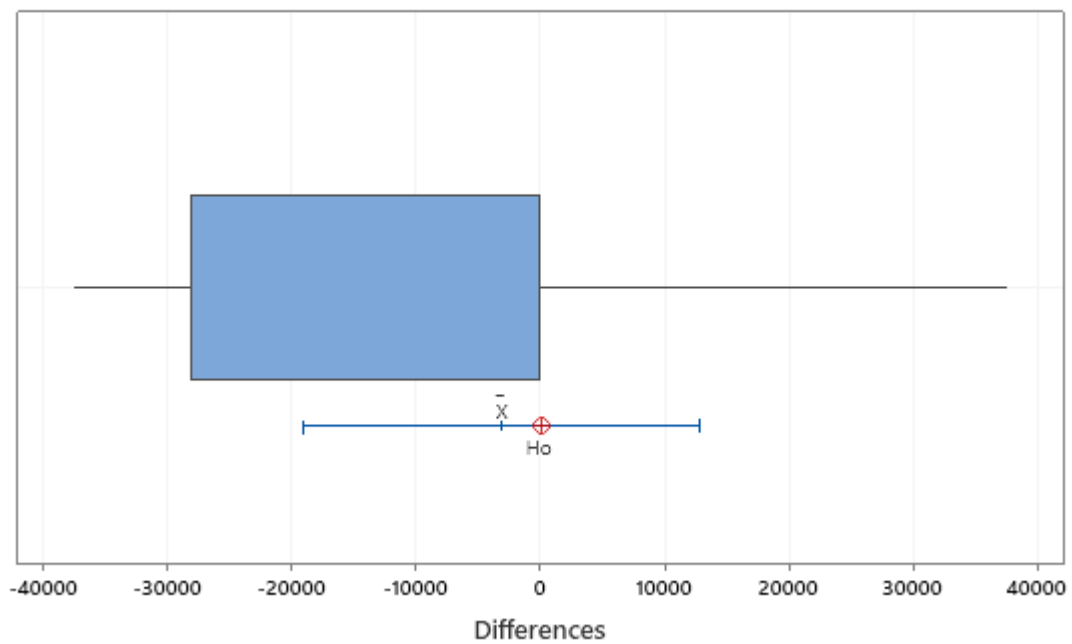

Supplement: MOESM13 [file 23144548]
