# Supplementary material for: The antibacterial effect of silver, zinc-oxide and combination of silver/ zinc oxide nanoparticles coating of orthodontic brackets (an in vitro study)
Source: Springer Nature journal article supplement (doi:10.1186/s12903-022-02263-6), 2022-06-09

## Paired T-Test and CI: Ag\_lacto\_T1, Ag\_lacto\_T2

### Descriptive Statistics

| Sample      | N  | Mean  | StDev | SE Mean |
|-------------|----|-------|-------|---------|
| Ag_lacto_T1 | 12 | 62.02 | 5.19  | 1.50    |
| Ag_lacto_T2 | 12 | 63.16 | 3.89  | 1.12    |

### Estimation for Paired Difference

| 95% CI for |       |         |                           |  |
|------------|-------|---------|---------------------------|--|
| Mean       | StDev | SE Mean | $\mu_{\text{difference}}$ |  |
| -1.14      | 5.57  | 1.61    | (-4.68, 2.40)             |  |

$\mu_{\text{difference}}$ : population mean of (Ag\_lacto\_T1 - Ag\_lacto\_T2)

### Test

Null hypothesis  $H_0: \mu_{\text{difference}} = 0$   
 Alternative hypothesis  $H_1: \mu_{\text{difference}} \neq 0$

| T-Value | P-Value |
|---------|---------|
| -0.71   | 0.494   |

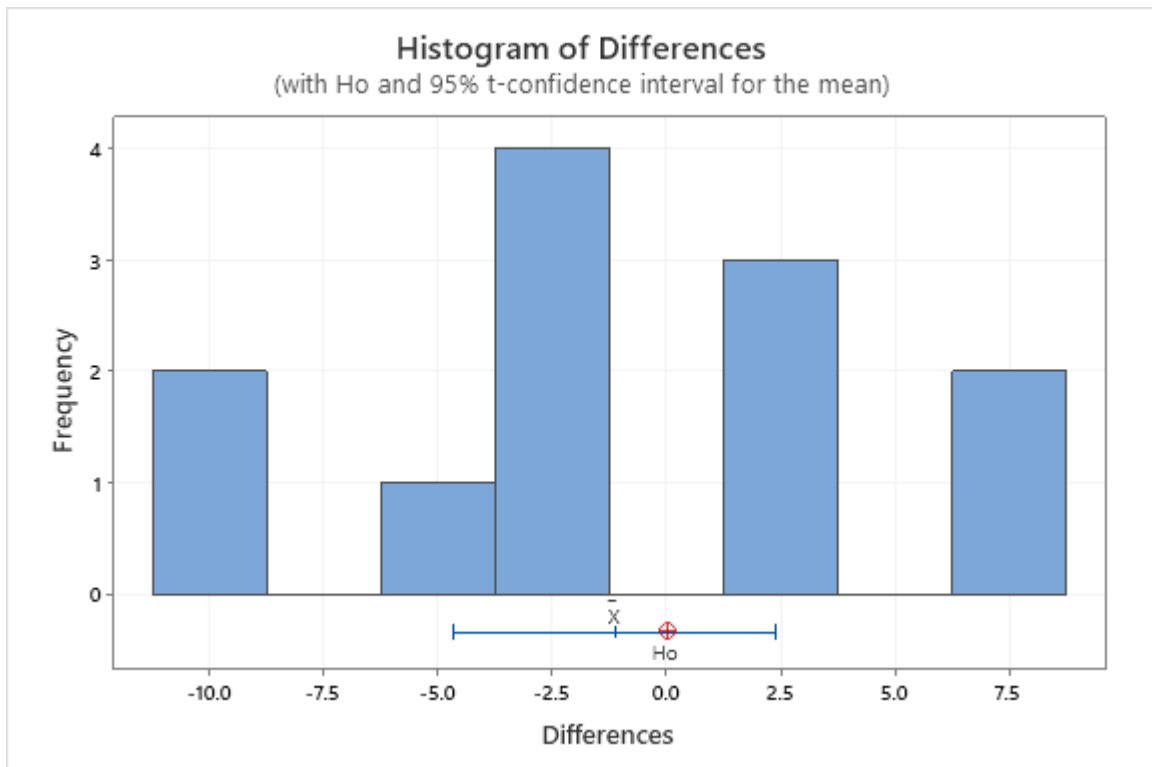

**Individual Value Plot of Differences**  
(with  $H_0$  and 95% t-confidence interval for the mean)

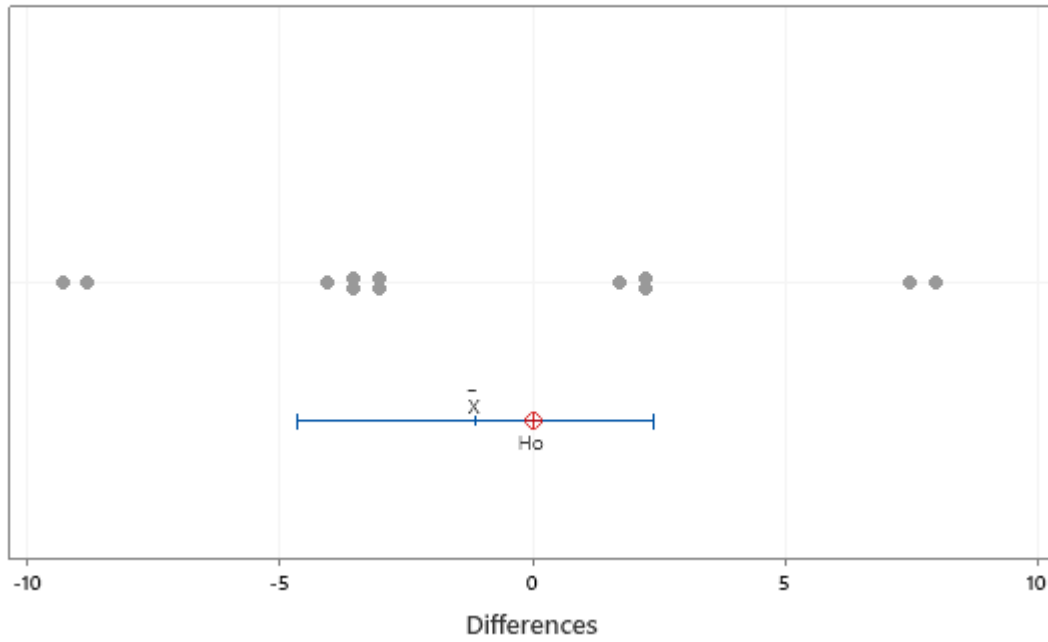

**Boxplot of Differences**  
(with  $H_0$  and 95% t-confidence interval for the mean)

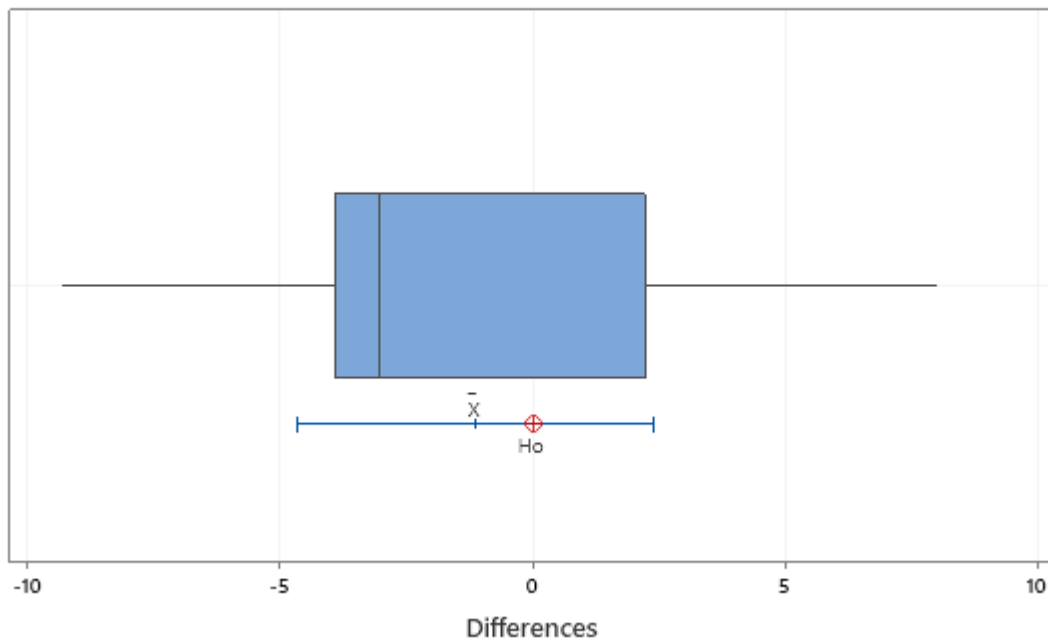

Supplement: MOESM14 [file 23144548]
