# Supplementary material for: The antibacterial effect of silver, zinc-oxide and combination of silver/ zinc oxide nanoparticles coating of orthodontic brackets (an in vitro study)
Source: Springer Nature journal article supplement (doi:10.1186/s12903-022-02263-6), 2022-06-09

## Paired T-Test and CI: Zno+Ag\_lacto\_T1, Zno+Ag\_lacto\_T2

### Descriptive Statistics

| Sample          | N  | Mean   | StDev | SE Mean |
|-----------------|----|--------|-------|---------|
| Zno+Ag_lacto_T1 | 12 | 80.288 | 2.971 | 0.858   |
| Zno+Ag_lacto_T2 | 12 | 81.579 | 2.749 | 0.793   |

### Estimation for Paired Difference

| 95% CI for |       |         |                  |
|------------|-------|---------|------------------|
| Mean       | StDev | SE Mean | $\mu$ difference |
| -1.29      | 3.69  | 1.07    | (-3.64, 1.05)    |

$\mu$  difference: population mean of (Zno+Ag\_lacto\_T1 - Zno+Ag\_lacto\_T2)

### Test

Null hypothesis  $H_0: \mu_{\text{difference}} = 0$   
 Alternative hypothesis  $H_1: \mu_{\text{difference}} \neq 0$

| T-Value | P-Value |
|---------|---------|
| -1.21   | 0.251   |

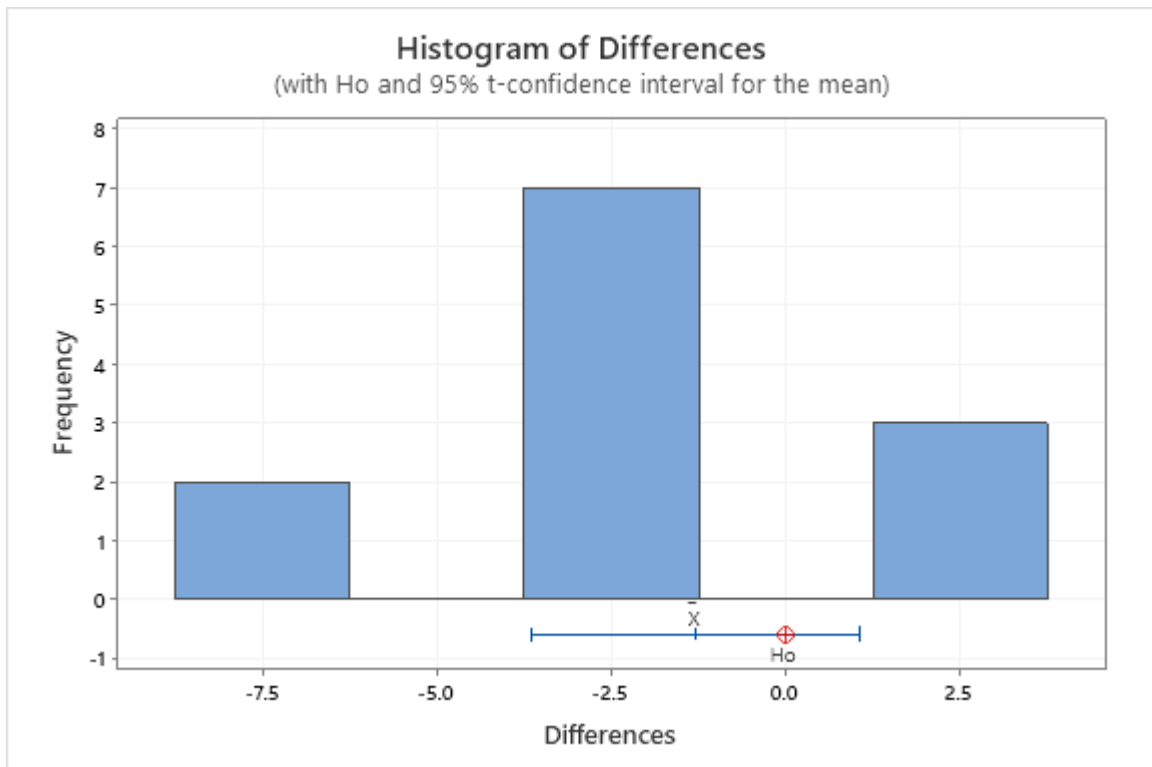

**Individual Value Plot of Differences**  
(with  $H_0$  and 95% t-confidence interval for the mean)

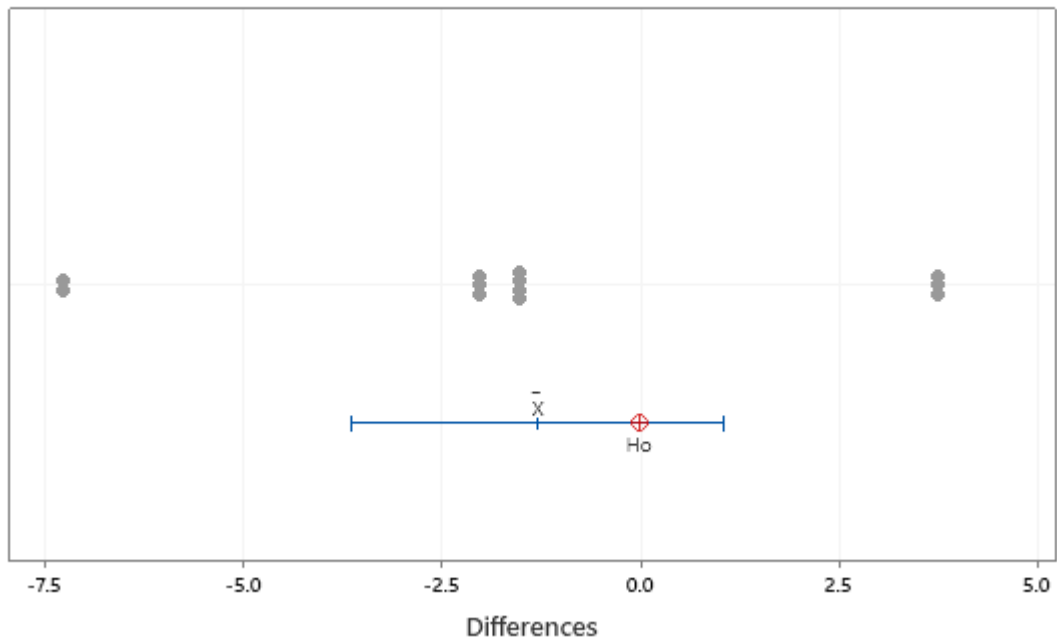

**Boxplot of Differences**  
(with  $H_0$  and 95% t-confidence interval for the mean)

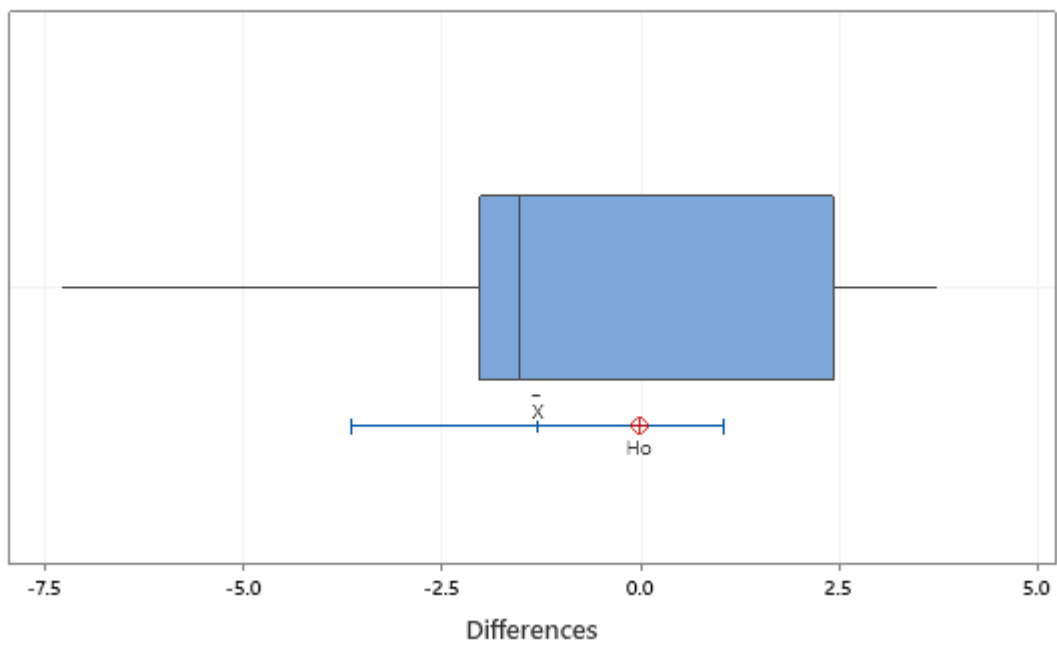

Supplement: MOESM16 [file 23144548]
